# **Distinct hydrogenotrophic bacteria are stimulated by elevated H<sub>2</sub> levels in upland and wetland soils**

Yongfeng Xu<sup>1,2</sup> #, Ying Teng<sup>1</sup> # \*, Xiyang Dong<sup>3</sup> #, Xiaomi Wang<sup>1</sup>, Chuwen Zhang<sup>3</sup>, Wenjie Ren<sup>1</sup>, Ling Zhao<sup>1</sup>, Yongming Luo<sup>1</sup>, Chris Greening<sup>4</sup>

<sup>1</sup> Key Laboratory of Soil Environment and Pollution Remediation, Institute of Soil Science, Chinese Academy of Sciences, Nanjing 210008, China

<sup>2</sup> College of Resources and Environment, University of Chinese Academy of Sciences, Beijing 100049, China

<sup>3</sup> School of Marine Sciences, Sun Yat-Sen University, Zhuhai 519082, China

<sup>4</sup> Department of Microbiology, Biomedicine Discovery Institute, Monash University, Clayton, VIC 3800, Australia

# These authors contributed equally to this work.

\* Correspondence may be addressed to:

Prof Ying Teng (yteng@issas.ac.cn)

## 1 **Abstract**

2 **Background:** Molecular hydrogen (H<sub>2</sub>) is a major energy source supporting bacterial  
3 growth and persistence in soil ecosystems. While recent studies have uncovered  
4 mediators of atmospheric H<sub>2</sub> consumption, far less is understood about how soil  
5 microbial communities respond to elevated H<sub>2</sub> levels produced through natural or  
6 anthropogenic processes. Here we performed microcosm experiments to resolve  
7 how microbial community composition, capabilities, and activities change in upland  
8 (meadow, fluvo-aquic soil) and wetland (rice paddy, anthrosols soil) soils following H<sub>2</sub>  
9 supplementation (at mixing doses from 0.5 to 50,000 ppmv).

10 **Results:** Genome-resolved metagenomic profiling revealed that these soils harbored  
11 diverse bacteria capable of using H<sub>2</sub> as an electron donor for aerobic respiration (46  
12 of the 196 MAGs from eight phyla) and carbon fixation (15 MAGs from three phyla).  
13 H<sub>2</sub> stimulated the growth of several of these putative hydrogenotrophs in a dose-  
14 dependent manner, though the lineages stimulated differed between the soils;  
15 whereas actinobacterial lineages encoding group 2a [NiFe]-hydrogenases grew most  
16 in the upland soils (i.e. Mycobacteriaceae, Pseudonocardiaceae), proteobacterial  
17 lineages harboring group 1d [NiFe]-hydrogenases were most enriched in wetland  
18 soils (i.e. Burkholderiaceae). Hydrogen supplementation also influenced the  
19 abundance of various other genes associated with biogeochemical cycling and  
20 bioremediation pathways to varying extents between soils. Reflecting this, we  
21 observed an enrichment of a hydrogenotrophic *Noviherbaspirillum* MAG capable of  
22 biphenyl hydroxylation in the wetland soils and verified that H<sub>2</sub> supplementation  
23 enhanced polychlorinated biphenyl (PCB) degradation in these soils, but not the  
24 upland soils.

25 **Conclusions:** Our findings suggest that soils harbour different hydrogenotrophic  
26 bacteria that rapidly grow following H<sub>2</sub> exposure. In turn, this adds to growing  
27 evidence of a large and robust soil H<sub>2</sub> sink capable of counteracting growing  
28 anthropogenic emissions.

29 **Keywords:** Hydrogenotrophic bacteria, Hydrogen, Hydrogenase, Carbon fixation,  
30 Biogeochemical cycling

## 31 Background

32 Recent work has revealed that molecular hydrogen (H<sub>2</sub>) oxidation is a widespread  
33 treat among soil bacteria [1–4]. H<sub>2</sub> is ubiquitously available in all soils through  
34 atmospheric and edaphic sources [5, 6]. Bacteria expend few resources to mobilize  
35 this gas, given both its diffusivity through cell membranes and low activation energy,  
36 and can use the large amount of free energy released by its oxidation for both ATP  
37 synthesis and carbon dioxide (CO<sub>2</sub>) fixation [2, 7, 8]. Genomic and metagenomic  
38 surveys have shown that soil bacteria from at least 17 different phyla encode [NiFe]-  
39 hydrogenases to consume H<sub>2</sub> an energy source [1–3, 9, 10]. The most abundant H<sub>2</sub>-  
40 oxidising taxa in oxygenated soils are generally Actinobacteriota, Acidobacteriota,  
41 and Chloroflexota that encode high-affinity group 1h [NiFe]-hydrogenases [11–19];  
42 culture-based studies show these bacteria use this enzyme to scavenge trace  
43 concentrations of H<sub>2</sub> as an alternative energy source for persistence when organic  
44 growth substrates are limiting [12, 15–17, 20–24]. A smaller proportion of soil  
45 bacteria can grow autotrophically or mixotrophically on H<sub>2</sub>/CO<sub>2</sub> [1, 3, 25–27].  
46 Classical studies have shown numerous Proteobacteria, for example *Ralstonia*  
47 *eutropha* and *Bradyrhizobium japonicum*, grow efficiently on high levels of H<sub>2</sub> using  
48 the low-affinity group 1d [NiFe]-hydrogenases [27–34]. More recently, diverse taxa  
49 have been shown to use group 2a [NiFe]-hydrogenases to grow on H<sub>2</sub> at a wide  
50 range of concentrations [35–39]. Some bacteria use H<sub>2</sub> for multiple purposes; for  
51 example, some *Mycobacterium* species switch between synthesising the growth-  
52 supporting 2a hydrogenase and persistence-supporting 1h hydrogenase in response  
53 to organic carbon availability [40–42].

54 Despite these advances, we lack a sophisticated understanding of how soil microbial  
55 communities respond to H<sub>2</sub> availability. In most soils, bacteria are primarily exposed  
56 to H<sub>2</sub> at atmospheric mixing ratios (~0.53 ppmv) [43, 44]. Soil bacteria use high- and  
57 medium-affinity hydrogenases to consume this trace energy source during growth or  
58 survival [3, 17, 37, 45–47]. Through their activity, approximately 70 million tonnes of  
59 the net H<sub>2</sub> lost from the atmosphere each year, with far-reaching ecological and  
60 biogeochemical consequences [6, 48–50]. This process supports the productivity  
61 and diversity of bacteria, especially in oligotrophic environments [3, 18, 51, 52].  
62 Moreover, it serves as the main sink in the global hydrogen cycle, in turn regulating

63 the redox state and greenhouse gas levels of the atmosphere [6, 50, 53].  
64 Nevertheless, multiple environments are known where H<sub>2</sub> availability is elevated, for  
65 example due to biological fermentation and nitrogen fixation, or geological processes.  
66 For example, H<sub>2</sub> can accumulate to percentage levels (~20,000 ppmv) at the  
67 interface of soils and root nodules, as a result of obligate H<sub>2</sub> production during the  
68 nitrogenase reaction [2, 54, 55]. In turn, these emissions have been proposed to  
69 influence rhizosphere microbial composition and potentially even fertilise plant  
70 growth [33, 56–59]. Furthermore, H<sub>2</sub> emissions have also been proposed to enhance  
71 bioremediation of organochloride pollutants through direct or indirect mechanisms  
72 [60–62]. However, it has proven highly challenging to disentangle the effects of H<sub>2</sub>  
73 exposure on microbial composition and activity in field settings from other variables.  
74 Similarly, unresolved is to what extent soil microbial communities can respond to  
75 anthropogenic H<sub>2</sub> emissions [50]. It has been controversially proposed that the  
76 transition to a hydrogen economy would drastically increase atmospheric H<sub>2</sub> levels  
77 and in turn induce climate forcing [63, 64]. Nevertheless, the microbial soil sink has  
78 so far maintained atmospheric H<sub>2</sub> at constant levels, despite anthropogenic activities  
79 currently accounting for approximately half of net atmospheric H<sub>2</sub> production [6].  
80 Thus, it is essential to understand how soil microbial composition responds to  
81 elevated H<sub>2</sub> to simultaneously resolve how this gas influences structure of natural  
82 ecosystems and predict responses to forecast emissions.

83 Several studies have used microcosms to investigate how soil microbial composition  
84 and activity changes following elevated H<sub>2</sub> (eH<sub>2</sub>) exposure, albeit with strikingly  
85 different results. A shift in the biphasic kinetics of soil H<sub>2</sub> uptake in response to  
86 elevated H<sub>2</sub> [65–67]: the high-affinity H<sub>2</sub> oxidation activities that dominate in  
87 untreated soils diminish in favour of fast-acting, low-affinity processes [67–70]. This  
88 suggests that low-affinity hydrogenotrophs become more abundant or active  
89 following H<sub>2</sub> exposure, though there are apparent discrepancies as to which. A  
90 pioneering study by Osborne *et al* indicated that H<sub>2</sub> production has a minimal effect  
91 on microbial abundance, composition, and diversity, but elicited a consistent  
92 enrichment of actinobacterial taxa across multiple soil types, including mycobacteria  
93 [57]. Zhang and colleagues, by contrast, observed Actinobacteriota decreased and  
94 Gammaproteobacteria increased following H<sub>2</sub> exposure [71]. Given both of these  
95 restriction fragment length polymorphism (RFLP)-based studies predated current

96 genome-resolved metagenomic approaches, the taxonomic identity and  
97 hydrogenase content of the enriched taxa could not be resolved. More recently, the  
98 Constant group have reexamined the effects of H<sub>2</sub> supplementation using amplicon  
99 and metagenomic sequencing. They observed large-scaler differences in community  
100 composition and function between the treatment and control groups [67, 72]. They  
101 also reported that H<sub>2</sub>-oxidising taxa are rare community members and hence couldn't  
102 be accurately accounted for even with deep metagenomic sequencing [73, 74].  
103 Another recent study reported enrichment of ammonia-oxidising archaea and  
104 specific actinobacterial and acidobacterial lineages, as well as ammonia-oxidising  
105 archaea, following soil H<sub>2</sub> infusion [75].

106 Altogether, these divergent observations warrant new investigations into the effects  
107 of H<sub>2</sub> exposure on microbial community composition and activities. To do so, we  
108 investigated how H<sub>2</sub> exposure at six different doses (from 0.5 to 50,000 ppmv)  
109 influences two agricultural soils from China with a legacy of organochloride pesticide  
110 usage, namely an anthrosols soil (herein wetland soil) and fluvo-aquic soil (herein  
111 upland soil). We combined high-resolution amplicon sequencing with deep genome-  
112 resolved metagenomic sequencing to resolve the taxonomic identities and metabolic  
113 capabilities of the taxa that change in abundance in response to H<sub>2</sub> exposure. We  
114 show that both soils harbour a high abundance and diversity of H<sub>2</sub>-oxidising bacteria,  
115 and most taxa capable of autotrophic growth on H<sub>2</sub>/CO<sub>2</sub> were generally enriched at  
116 higher H<sub>2</sub> concentrations. However, reflecting differences in the community structure  
117 of the original soils, the enriched lineages strikingly differ in both phylogenetic  
118 affiliation and hydrogenase content between the upland and wetland microcosms.  
119 Contrasting changes in biogeochemical cycling genes and, building on our previous  
120 observations [60, 61], polychlorinated biphenyl (PCB) biodegradation processes  
121 were also observed between the soils following H<sub>2</sub> exposure. Thus, the effects of H<sub>2</sub>  
122 supplementation are highly ecosystem-specific, which reconciles the perplexingly  
123 different responses observed to H<sub>2</sub> supplementation in studies in this area.

124

## 125 **Results and Discussion**

126 **Elevated H<sub>2</sub> stimulates growth of different bacteria between the soils, but does**  
127 **not significantly affect community richness or abundance**

128 We first used the 16S rRNA gene as a marker to profile how abundance, alpha  
129 diversity, and beta diversity of bacteria and archaea present in the wetland and  
130 upland soils changed in response to H<sub>2</sub> exposure. In agreement with the findings of  
131 Osborne et al [57], no significant change was observed in community abundance  
132 (based on 16S rRNA gene qPCR; **Fig. 1a & Fig. S1a**) or diversity (based on  
133 observed richness, Chao1 richness, and Shannon diversity of 16S rRNA gene  
134 amplicon sequence variants; **Fig. 1a & Fig. S2**) between the control and treatment  
135 microcosms. However, bacterial community composition changed in response to the  
136 H<sub>2</sub> treatment after 84 days. Distance-based redundancy analysis (db-RDA) of beta  
137 diversity (Bray-Curtis of 16S rRNA gene amplicon sequence variants) confirmed H<sub>2</sub>  
138 concentration is the predictor variable most significantly correlated with changes in  
139 bacterial community composition between the microcosms ( $R^2 = 0.819$ ,  $p = 0.001$  in  
140 the wetland soil;  $R^2 = 0.950$ ,  $p = 0.001$  in the upland soil; **Table S1**). For example,  
141 the samples treated with elevated H<sub>2</sub> (500 to 50,000 ppmv in the wetland soil; 20,000  
142 to 50,000 ppmv in the upland soil) formed distinct clusters from the control in PCoA  
143 data space (**Fig. 1b**). Three other predictor variables were also correlated with  
144 changes in community composition, most notably pH ( $R^2 = 0.629$ ,  $p = 0.001$  in the  
145 wetland soil;  $R^2 = 0.320$ ,  $p = 0.047$  in the upland soil; **Table S1**), which significant  
146 decreased during the H<sub>2</sub>-enriched microcosms likely as a result of soil bacteria  
147 oxidising H<sub>2</sub> to protons (**Table 1**).

148 Microbial community composition was determined using a combination of 16S rRNA  
149 gene amplicon sequencing and reconstruction of 16S rRNA gene sequences from  
150 metagenomic raw reads via GraftM (metagenomes sequenced for microcosms  
151 exposed to 0.5, 20,000, and 50,000 ppmv H<sub>2</sub> only). Observed phylum-level  
152 community composition was comparable between profiles from metagenomic and  
153 amplicon sequencing (**Fig. 1c**). In both soils, most community members (>80%)  
154 affiliated with six of the globally dominant soil phyla [76, 77], namely Proteobacteria,  
155 Firmicutes, Acidobacteriota, Actinobacteriota, Chloroflexota, and Gemmatimonadota  
156 (**Fig. 1c**). Significant changes in microbial community composition was observed at  
157 both phylum and genus levels in response to H<sub>2</sub> treatment. In both soils, there  
158 decrease in the relative abundance of Firmicutes in the treatment vs control

159 microcosms after 84 days, primarily due to the decline of several Bacilli genera.  
160 However, the enriched bacteria strikingly differed between the soils. For the wetland  
161 soils, in line with previous observations by Zhang *et al.* [71], there was an enrichment  
162 in the phylum Proteobacteria (**Fig.1c & Table S2**). This was driven by significant  
163 increases in the relative abundance (by over 1%,  $p < 0.05$ ) of genera such as *Dongia*,  
164 and *Noviherbaspirillum* (**Fig. 1d & Table S3**). In contrast, in the upland soils, the  
165 most enriched taxa were *Mycobacterium* (Actinobacteriota) and *Candidatus*  
166 *Koribacter* (Acidobacteriota); whereas *Mycobacterium* was a member of the rare  
167 biosphere in the control microcosms (0.04% relative abundance), it grew in a dose-  
168 dependent manner to become the most abundant genus in the 50,000 ppmv  
169 treatments based on both amplicon (5.58%) and metagenomic sequencing (4.86 %) (**Fig. 1d & Table S3**). This observation of a large single-member community shift is  
171 remarkably similar to Osborne *et al.*'s RFLP-based inference of the enrichment of  
172 actinobacterial taxa, including *Mycobacterium*, following H<sub>2</sub> exposure in Australian  
173 soils [57].

174 To gain further insight into community responses to elevated H<sub>2</sub>, we assembled and  
175 binned the metagenomes, yielding 196 metagenome-assembled genomes (MAGs;  
176 **Table S4**). Reconstructed MAGs comprise taxonomically diverse members from a  
177 total of two archaeal and 22 bacterial phyla (**Fig. 2** and **Table S4**). In support of 16S  
178 rRNA gene amplicon analysis (**Fig. 1d**), most MAGs affiliated with the phyla  
179 Proteobacteria (52), Actinobacteriota (30), Acidobacteriota (22), Gemmatimonadota  
180 (20), and Chloroflexota (15). We also retrieved a surprising number of  
181 Patescibacteria MAGs (17), supporting recent reports that these symbionts can be  
182 abundant in oxygenated soils [78, 79]. Based on metagenomic read mapping, there  
183 was a significant enrichment of 21 MAGs (12 phyla) in the wetland soil microcosms  
184 and 10 MAGs (4 phyla) from in the upland microcosms at high H<sub>2</sub> treatments,  
185 suggesting a complex response at the individual taxon level (**Fig. 2**). In line with the  
186 amplicon- and metagenome-based 16S rRNA gene analysis (**Fig. 1 & Table S3**,  
187 some MAGs became highly abundant after higher H<sub>2</sub> treatments, potentially through  
188 hydrogenotrophic growth. The most enriched MAGs overall were *Noviherbaspirillum*-  
189 affiliated Bin377 in the wetland soil (0.017%, 0.38%, and 0.22% at 0.5, 20,000, and  
190 50,000 ppmv respectively) and *Mycobacterium*-affiliated BinFLU20000R1\_4 in the

191 upland soil (0%, 0.59%, and 1.36% at 0.5, 20,000, and 50,000 ppmv respectively)  
192 **(Fig. 2).**

### 193 **Enriched taxa encode different hydrogenase and RuBisCO lineages known to** 194 **support hydrogenotrophic growth**

195 We used curated metabolic marker gene databases to annotate the metagenomic  
196 short reads and derived MAGs with a focus on H<sub>2</sub> metabolism and carbon fixation  
197 pathways. In agreement with our recent findings in Australian soils [3], most  
198 community members were predicted to metabolically versatile with respect to  
199 electron donor, electron acceptor, and carbon source preferences (**Fig. 3, Fig. S3,**  
200 **Table S5 & Table S6**). As expected from the community profile (**Fig. 1 & Table S3**),  
201 almost all community members encoded markers for aerobic respiration (notably  
202 CoxA, CcoN, CydA), with many having the capacity for denitrification (notably NarG,  
203 NirK, NorB, NosZ) and hydrogenogenic fermentation (group 3b [NiFe]-hydrogenases)  
204 (**Fig. S3**). With respect to electron donor utilisation, the marker genes for the  
205 oxidation of organic compounds (NuoF, SdhA), H<sub>2</sub> (uptake hydrogenases), carbon  
206 monoxide (CoxL), formate (FdhA), and sulfide (Sqr) were abundant in the short  
207 reads and widespread in the MAGs. Moreover, there was a widespread capacity for  
208 carbon fixation primarily through the Calvin–Benson–Bassham cycle (RbcL) (**Figs. 2**  
209 **& 3**). As expected, we observed significant increases in the relative abundance of  
210 uptake hydrogenases and RuBisCO for both soils in the high H<sub>2</sub> microcosms,  
211 suggesting hydrogenotrophic growth. There were also small but significant changes  
212 in the abundance of certain genes involved in aerobic respiration, denitrification,  
213 nitrogen fixation, and sulfide, nitrite, and arsenite oxidation. Moreover, in the wetland  
214 soils, there was a large enrichment of a gene (BphA) for biphenyl degradation  
215 following H<sub>2</sub> treatment (**Fig. 3 & Table S6**).

216 To gain a deeper insight into the determinants of hydrogenotrophic growth, we built  
217 phylogenetic trees to classify the [NiFe]-hydrogenase (**Fig. S4**) and RuBisCO (**Fig.**  
218 **S5**) sequences retrieved from the MAGs based on functionally predictive schemes  
219 [80, 81]. Respiratory uptake hydrogenases were encoded by 46 MAGs from nine soil  
220 phyla. Many MAGs encoded group 1h [NiFe]-hydrogenases, suggesting they persist  
221 in soils by scavenging H<sub>2</sub> at atmospheric levels; these hydrogenases were present in  
222 taxa as diverse as Actinobacteriota (8), Acidobacteriota (6), Proteobacteria (2),



223 Bdellovibrionota (1), Eremiobacterota (1), Gemmatimonadota (1), and Myxococcota  
224 (1), in line with recent inferences of a diverse and abundant H<sub>2</sub> sink in soils [3, 17,  
225 78]. However, a range of taxa also encoded hydrogenases implicated in  
226 hydrogenotrophic growth, such as the group 1d and 2a [NiFe]-hydrogenases [37, 82],  
227 as well as the functionally enigmatic group 1c and 1f [NiFe]-hydrogenases [3, 45]  
228 (**Fig. S4**). Of these, four Actinobacteriota, three Proteobacteria, and one  
229 Acidobacteriota MAGs co-encoded uptake hydrogenases with RuBisCO (**Fig. 2**).  
230 Seven of these eight MAGs increased in abundance in the H<sub>2</sub>-supplemented soils,  
231 including the previously highlighted Bin377 (*Noviherbaspirillum*) and  
232 BinFLU20000R1\_4 (*Mycobacterium*). This suggests that these bacteria grow  
233 hydrogenotrophically by using electrons derived from H<sub>2</sub> for aerobic respiration and  
234 carbon fixation. These metagenomic inferences are supported by previous culture-  
235 based studies observing hydrogenotrophic growth in various *Mycobacterium* species  
236 [42, 83, 84] and a rice paddy *Noviherbaspirillum* isolate [85]. Thus, the most strongly  
237 enriched MAGs in high H<sub>2</sub> microcosms were among those capable of  
238 hydrogenotrophic growth.

239 The enzyme lineages supporting hydrogenotrophic growth differed between the soils.  
240 In the upland soils, the most enriched lineages were Mycobacteriaceae and  
241 Pseudonocardiaceae harbouring group 2a [NiFe]-hydrogenases with type IE  
242 RuBisCO, such as the *Mycobacterium* MAG (**Fig S4 & S5**). In these soils, the  
243 abundance of short reads encoding the group 2a [NiFe]-hydrogenase increased by  
244 17-fold ( $p = 0.0095$ ) and 49-fold ( $p = 0.0028$ ) at H<sub>2</sub> doses of 20,000 ppmv and 50,000  
245 ppmv respectively. By contrast, in the wetland soils, the most enriched lineages were  
246 Burkholderiaceae that encoded group 1d and 2b [NiFe]-hydrogenases together with  
247 type IA or IC RuBisCO, including two *Noviherbaspirillum* MAGs. Consistently, in the  
248 metagenomic short reads for the wetland soil, there was an increase in relative  
249 abundance of the uptake 1d [NiFe]-hydrogenase (1.8-fold,  $p = 0.0034$ ) and the  
250 sensory 2b [NiFe]-hydrogenase (15-fold;  $p = 0.0025$ ). Based on the precedent of the  
251 closely related species *Ralstonia eutropha* (Burkholderiaceae), stimulation of the  
252 sensory hydrogenase by elevated H<sub>2</sub> activates a signal transduction cascade that  
253 increases transcription of the uptake hydrogenase and in turn enables  
254 hydrogenotrophic growth [86, 87]. Thus, bacteria with the capacity to both sense and  
255 oxidise H<sub>2</sub> can rapidly respond to this energy source becoming available. It should be

256 noted that, while the group 1h and 3b [NiFe]-hydrogenases were the most  
257 widespread hydrogenases in both soils overall, their abundance minimally changed  
258 in response to H<sub>2</sub> exposure; this reflects their respective physiological roles in  
259 supporting persistence through atmospheric H<sub>2</sub> oxidation during carbon starvation  
260 and fermentative H<sub>2</sub> production during hypoxia [21, 22, 40]. Consistent with the  
261 community composition (**Fig. 1c**), Uptake hydrogenases and other marker genes  
262 associated with anaerobic H<sub>2</sub> oxidation processes (e.g. methanogenesis,  
263 acetogenesis, sulfate reduction) were in low abundance in all microcosms.

### 264 **Hydrogenotrophic growth of a specific taxon underlies enhanced PCB** 265 **bioremediation in H<sub>2</sub>-stimulated wetland soils**

266 Of the 86 genes profiled, other than hydrogenases and RuBisCO, the determinants  
267 of PCB bioremediation showed the greatest fold change in response to H<sub>2</sub>  
268 supplementation. Based on short reads, in the H<sub>2</sub>-enriched wetland microcosms, we  
269 observed a 3.9-fold increase in relative abundance of the genes encoding biphenyl  
270 dioxygenase (*bphA*). No equivalent enrichment was observed in the upland soil, by  
271 contrast. At the MAG level, 14 MAGs encoded enzymes for biphenyl oxidation to  
272 benzoate (Proteobacteria, Myxocococcota, Chloroflexota, Dadabacteria) (**Fig. S6 &**  
273 **Table S7**). Of these, the metabolic capabilities of four MAGs (>90% completeness,  
274 <5% contamination) are depicted in **Fig. 4a**. Five of these MAGs increased in  
275 abundance at elevated H<sub>2</sub> concentrations in wetland soils, including the  
276 aforementioned Bin377 (*Noviherbaspirillum*), which was the sole MAG encoding the  
277 *bphA* gene.

278 Consistent with these observations, we observed divergent effects of elevated H<sub>2</sub> on  
279 PCB77 biodegradation in the two soils (**Fig. 4b**). After 84 days, the degradation rate  
280 of PCB77 in the wetland soil at elevated H<sub>2</sub> concentrations (5000-50000 ppmv) were  
281 significantly promoted by 7.65 to 12.66% compared with the 0.5 ppmv ( $p < 0.05$ ,  
282 **Table 1 & Fig. 4b**). By contrast, there were no significant promotion of PCB77  
283 degradation in the upland soil at elevated H<sub>2</sub> concentrations during the experimental  
284 period (**Table 1 & Fig. 4b**). Altogether, these findings provide a mechanistic rationale  
285 for our previous observations that PCB bioremediation is enhanced both by nitrogen  
286 fixation (resulting in endogenous H<sub>2</sub> production) and endogenous H<sub>2</sub> addition [60, 61];

287 the enrichment of hydrogenotrophic Burkholderiaceae and likely other taxa encoding  
288 biphenyl oxidation genes enhances bioremediation primarily through indirect effects.

289

## 290 **Conclusions**

291 This study demonstrates that phylogenetically and physiologically diverse H<sub>2</sub>-  
292 oxidising bacteria reside in soils. Whereas most of these bacteria are  
293 organoheterotrophs predicted to persist on trace concentrations of H<sub>2</sub>, a few  
294 community members are facultative autotrophs that grow on this gas when available  
295 in elevated concentrations. In our microcosms, the bacterial, hydrogenase, and  
296 RuBisCO lineages that were enriched in response to H<sub>2</sub> availability strikingly differed  
297 between the soils, in a way that reflected their native community composition. In the  
298 upland soil, the *Mycobacterium* MAG and several other lineages emerged from the  
299 rare biosphere to become dominant community members in the upland soils,  
300 whereas in the wetland soil a *Noviherbaspirillum* MAG possessing two hydrogenases  
301 likely sensed and rapidly consumed high concentrations of H<sub>2</sub>. These findings in turn  
302 provide a holistic community context to previous culture-based investigations on  
303 hydrogenotrophic Actinobacteriota and Proteobacteria. Moreover, these  
304 observations findings reconcile the seemingly divergent findings of earlier RFLP-  
305 based studies in this area [57, 71], though are less compatible with certain recent  
306 reports [67, 72, 74]. Overall, we found that H<sub>2</sub> supplementation did not profoundly  
307 affect microbial community abundance, diversity, or capabilities. However, it can be  
308 expected that enrichment of hydrogenotrophic taxa will have various effects on  
309 biogeochemical activities, as reflected by the increased genetic capacity and  
310 biochemical activity for PCB biodegradation captures in the wetland. Extending these  
311 findings, we predict that hydrogen emissions from natural or anthropogenic sources  
312 would select for the growth of facultative hydrogenotrophs, though the lineages  
313 stimulated are likely to greatly vary between soils.

314

## 315 **Methods**

### 316 **Experimental soils**

317 The top 20 cm of the soil profile of two agricultural soils were sampled for the  
318 microcosm experiments. An anthrosols soil, known to have a high capacity for  
319 pollutant remediation [88], was sampled from long-term paddy wetland field  
320 experimental station of the Chinese Academy of Sciences located at Changshu,  
321 Jiangsu province (31°33'N, 120°38'E). A flavo-aquic soil was sampled at a long-term  
322 abandoned meadow upland field, formerly highly polluted by PCBs, from Taizhou,  
323 Zhejiang province (28°31'N, 121°22'E). Both soils were air-dried in the laboratory  
324 and then passed through a 10-mesh screen to remove roots and large particles  
325 before the preparation of soil microcosms. PCB levels in both soils are within  
326 permissible levels, with total concentrations of 21 PCBs below 60  $\mu\text{g kg}^{-1}$  and no  
327 PCB77 detected in either soil. Detailed soil properties are listed in **Table S8**.

### 328 **Microcosm setup and sampling**

329 Prior to the microcosm setup, each soil was adjusted to a moisture of 10% (w/w) and  
330 preconditioned at 30 °C for one week. In order to monitor effects of H<sub>2</sub>  
331 supplementation on soil microbial communities and bioremediation, PCB77 was also  
332 added to both soils to a final concentration of 1 mg kg<sup>-1</sup>. Specifically, 15 mL of  
333 PCB77 stock solution (100 mg L<sup>-1</sup> in acetone) was added to 150 g soil (dry weight) to  
334 achieve a concentration of 10 mg kg<sup>-1</sup>; the soils were placed in a fume hood  
335 overnight to evaporate the acetone and they were then thoroughly mixed with 1350 g  
336 uncontaminated soil. Thereafter, approximately 10 g of soil (dry weight) was placed  
337 in a 120 mL serum bottle and adjusted to a water content of 30 % (w/w) with  
338 sterilized water. The serum bottles were sealed with butyl rubber stoppers. The  
339 bottles were flushed with synthetic air (360 ppmv CO<sub>2</sub> and 21 % O<sub>2</sub> balanced with N<sub>2</sub>;  
340 55th Research Institute, China Electronics Technology Group Corporation) for 30 s  
341 and then an appropriate volume of synthetic air was withdrawn. A defined volume of  
342 ultra-pure H<sub>2</sub> (99.9999%; 55th Research Institute, China Electronics Technology  
343 Group Corporation) gas was injected to obtain six initial headspace mixing doses of  
344 H<sub>2</sub> (0.5, 50, 500, 5,000, 20,000, and 50,000 ppmv). The 0.5 ppmv vials served as  
345 controls, given they reflect ambient H<sub>2</sub> concentrations, whereas the five other vials  
346 served as treatment groups with elevated H<sub>2</sub> levels. A sterile control (autoclaving at  
347 121 °C, 1 h three times) was also setup to exclude the factors of soil adsorption of  
348 PCB77 (**Fig. S7**). Each day, the control, treatment, and sterile control serum bottles

349 were flushed with synthetic air and then the initial concentrations of H<sub>2</sub> were re-  
350 established as described above, thereby providing a regular H<sub>2</sub> supply. All  
351 treatments were set up in triplicate and incubated at 30 °C in the dark for 84 days.  
352 Samples were taken on days 0, 14, 28, 56 and 84 for DNA extraction and PCB77  
353 quantification.

### 354 **Analysis of physicochemical properties and PCB77 contents**

355 To determine physicochemical properties and quantify PCB77 levels, freeze-dried  
356 soil samples were sieved through a 60-mesh screen to obtain a homogeneous  
357 matrix.

358 The pH, soil organic matter content (SOM), total nitrogen (TN), total phosphorus (TP),  
359 total potassium (TK), alkali-hydrolyzable nitrogen (AN), available phosphorus (AP),  
360 and available potassium (AK) were measured as previously described [89]. Briefly,  
361 soil pH was determined in a soil/water suspension (1:2.5) using pH meter; SOM was  
362 measured by the K<sub>2</sub>Cr<sub>2</sub>O<sub>7</sub>-H<sub>2</sub>SO<sub>4</sub> oxidation method; TN was determined by Kjeldahl  
363 digestion; TP and TK were determined by molybdenum-blue colorimetry and flame  
364 photometry respectively after HF-HClO<sub>4</sub> treatment; AN was assayed by alkali-  
365 hydrolyzed diffusion method; AP was determined by sodium bicarbonate extraction  
366 and molybdenum blue colorimetry; and AK was detected by ammonium acetate  
367 extraction and subsequent flame photometer analysis.

368 Soil PCB77 was extracted as described by Huang et al [90]. PCB 77 concentrations  
369 were detected by GC7890 gas chromatograph (Agilent Technologies, Santa Clara,  
370 CA) equipped with a HP5 column (30 m × 0.32 mm × 0.25 μm). The recovery rates  
371 for all the samples and detection limit of the GC method for PCB77 ranged from 87  
372 to 102 % and 2.53 to 5.75 μg kg<sup>-1</sup> respectively.

### 373 **DNA extraction**

374 Community DNA was extracted from fresh soil using the FastDNA spin kit for soil  
375 (MP Biomedicals, Santa Ana, CA) following the manufacturer's instructions. Sample  
376 DNA integrity was examined by electrophoresis on a 0.8 % agarose gel. Sample  
377 DNA quantity and purity were determined with a Nanodrop ND-2000 UV-Vis

378 spectrophotometer (NanoDrop Technologies, Wilmington, DE) and using Quant-iT  
379 PicoGreen fluorescence (Thermo Fisher, Waltham, MA). The DNA samples were  
380 stored at -80 °C before use.

### 381 **Quantitative PCR assays**

382 Quantitative PCR (qPCR) was used to quantify the copy number of 16S rRNA genes  
383 for (i) whole bacterial and archaeal community and (ii) anaerobic PCB-degrading  
384 genus *Dehalobacter* [91]. PCR amplification was performed using the primer sets  
385 515F/907R and Dhb-477F/ 647R (**Table S9**) with cycling conditions as previously  
386 described [92]. The qPCR reactions were conducted for each soil DNA extract in  
387 triplicate. Standard curves were established using a linear PCR product by a 10-fold  
388 serial dilution of plasmid DNA that contained the target fragment. The amplification  
389 efficiencies were 97.5-99.8%.

### 390 **16S rRNA gene amplicon sequencing and analysis**

391 The V4-V5 region of the 16S rRNA gene was used to determine the composition of  
392 the soil microbial communities with universal prokaryotic primer sets 515F/907R  
393 (**Table S9**) for 36 samples at 84 days (0.5, 50, 500, 5000, 20000, and 50000 ppmv  
394 H<sub>2</sub> treatment). Amplification of the 16S rRNA gene target was performed according  
395 to the manufacturer's instructions (Illumina). The amplicons were sequenced by the  
396 Majorbio Company (Shanghai, China) following the manufacturer's instructions with  
397 a MiSeq PE300 platform (Illumina, San Diego, CA, USA).

398 The resulting raw reads were processed on the QIIME2 platform (version 2020.02)  
399 using the DADA2 pipeline to resolve exact amplicon sequence variants (ASVs) [93,  
400 94]. The taxonomy of each 16S rRNA gene sequence was analysed using RDP  
401 classifier algorithm (<http://rdp.cme.msu.edu/>) against Silva (SSU132) 16S rRNA  
402 gene database and the Unite (Release 6.0) database using a confidence threshold  
403 of 70% [95]. Alpha diversity (including observed richness, Chao1 richness, and  
404 Shannon index) and beta diversity (Bray Curtis) were calculated with mothur (version  
405 v.1.30.1, collect single command) and QIIME2 with the default parameters,  
406 respectively [96]. The relationships between beta diversity and environmental  
407 variables were displayed through distance-based redundancy analyses (db-RDA)

408 based on Bray-Curtis distance (R: vegan package, version 4.0.3). A one-way  
409 analysis of variance (ANOVA) to test for significant differences in community  
410 structure between different H<sub>2</sub> concentration treatments.

#### 411 **Metagenomic sequencing, assembly and binning**

412 Based on the results of 16S rRNA gene amplicon sequencing, the samples from  
413 higher H<sub>2</sub> concentrations treatments (20,000 and 50,000 ppmv) showing obvious  
414 succession of bacterial communities with 0.5 ppmv at 84 days were subject to  
415 metagenomic analysis. The extracted DNA was sheared into approximately 400 bp  
416 fragments using a Covaris M220 shaker (Gene Company Limited, China). The  
417 metagenomic libraries were prepared using the NEXTFLEX Rapid DNA-Seq Kit  
418 (PerkinElmer Bioo Scientific, USA). Paired-end sequencing was performed on the  
419 Illumina HiSeq 4000 platform (Illumina Inc., San Diego, CA, USA) at Shanghai  
420 Majorbio Bio-pharm Technology Co., Ltd. About six billion base pairs (~6 Gbp) of  
421 DNA sequences were generated for each sample (**Table S10**). To explore microbial  
422 composition of each sample, taxonomic assignments of raw reads were assigned  
423 using GraftM [97] together with Silva (SSU132) 16S rRNA gene database [95].

424 Raw reads were quality-controlled using Read\_QC module in the metaWRAP  
425 pipeline [98]. The quality-controlled metagenomes were individually assembled and  
426 co-assembled using MEGAHIT v1.1.3 (default parameters) [99]. The resulting  
427 assemblies were binned using the binning module within the metaWRAP pipeline (--  
428 metabat2 --maxbin2 --concoct for individual assembly; --metabat2 for co-assembly).  
429 For each assembly, the three bin sets were then consolidated into a final bin set with  
430 the bin\_refinement module of metaWRAP (-c 50 -x 10 options). The final bin sets  
431 from both individual assemblies and co-assembly were aggregated and de-  
432 replicated using dRep v2.5.4 [100] at 95% average nucleotide identity (-comp 50 -  
433 con 10 options). The quality (completeness and contamination) of MAGs was  
434 assessed with CheckM [101].

435 The taxonomy of each MAG was temporally assigned using GTDB-Tk [102] (GTDB  
436 R04-RS89 database). The relative abundance of each MAGs was calculated with  
437 CoverM (<https://github.com/wwood/CoverM>) as previously described [103]. The

438 taxonomic classification, size, completeness, contamination, strain heterogeneity,  
439 and N50 of recovered MAGs are summarized in **Table S4**.

#### 440 **Functional annotation of reads and MAGs**

441 For functional annotation of quality-filtered reads with lengths over 140 bp, metabolic  
442 marker genes covering the major pathways associated with hydrogen cycling,  
443 carbon fixation, oxidative phosphorylation, anaerobic PCB degradation (reductive  
444 dehalogenation), and the cycling of nitrogen compounds, sulfur compounds,  
445 methane, and carbon monoxide were searched as previously described [78].  
446 DIAMOND *blastx* mapping [104] was performed with a query coverage threshold of  
447 80% for all databases, and a percentage identity threshold of 50%, except for group  
448 4 [NiFe]-hydrogenases, [FeFe]-hydrogenases, CoxL, AmoA, and NxrA (all 60%),  
449 PsaA (80%), PsaA and IsoA (70%), and HbsT (75%). These reads were then  
450 transformed to per kilobase per million (RPKM) [105]. Functional annotation of  
451 putative amino acid sequences involved in aerobic PCB degradation (biphenyl  
452 degradation, including BphA, BphB, BphC and BphD) was searched as described in  
453 the **supplementary note**. The gene abundance in the microbial community was  
454 then estimated by the method according to Ortiz et al., [78]. Briefly, 14 universal  
455 single copy ribosomal marker genes were also transformed to RPKM and gene  
456 abundance in the microbial community was calculated by dividing the read count for  
457 the gene (in RPKM) by the mean of the read counts of the 14 universal single copy  
458 ribosomal marker genes (in RPKM). For each MAG, genes were called by Prodigal  
459 (-p meta) [106]. Genes involved metabolic functions as described above were  
460 carried out using DIAMOND *blastp* with a minimum percentage identity of 60%  
461 (NuoF), 70% (AtpA, ARO, YgfK) or 50% (all other databases) [78], while genes  
462 involved in biphenyl degradation were annotated against KEGG database using  
463 GhostKOALA [107].

#### 464 **Phylogenetic analysis**

465 For phylogenetic tree construction of MAGs, ribosomal protein sequences generated  
466 from CheckM were extracted and aligned using MAFFT [108]. Gaps in the alignment  
467 were removed and the ribosomal protein alignment concatenated as described  
468 previously [109]. RAxML webserver (<https://www.phylo.org/>) was used to construct



469 the phylogenetic tree with the parameters: raxmlHPC-HYBRID -f a -n result -s input -  
470 c 25 -N 160 -p 12345 -m PROTCATLG -x 12345, with the output file uploaded to  
471 iTOL for visualization [110].

472 For amino acid sequences of the group 1, 2 [NiFe]-hydrogenase and ribulose 1,5-  
473 bisphosphate carboxylase/oxygenase (RuBisCO) large subunit (RbcL), sequences  
474 were aligned using the ClustalW algorithm included in MEGA7 [111]. Their  
475 maximum-likelihood phylogenetic trees were constructed using the JTT matrix-  
476 based model, and was bootstrapped with 50 replicates and midpoint-rooted.

477

## 478 **References**

- 479 1. Greening C, Biswas A, Carere CR, Jackson CJ, Taylor MC, Stott MB, et al.  
480 Genomic and metagenomic surveys of hydrogenase distribution indicate H<sub>2</sub> is  
481 a widely utilised energy source for microbial growth and survival. *ISME J* 2016;  
482 10: 761–777.
- 483 2. Piché-Choquette S, Constant P. Molecular hydrogen, a neglected key driver of  
484 soil biogeochemical processes. *Appl Environ Microbiol* 2019; 85: e02418-18.
- 485 3. Bay SK, Dong X, Bradley JA, Leung PM, Grinter R, Jirapanjawan T, et al.  
486 Trace gas oxidizers are widespread and active members of soil microbial  
487 communities. *Nat Microbiol* 2020; In press.
- 488 4. Peters JW, Schut GJ, Boyd ES, Mulder DW, Shepard EM, Broderick JB, et al.  
489 [FeFe]- and [NiFe]-hydrogenase diversity, mechanism, and maturation.  
490 *Biochim Biophys Acta - Mol Cell Res* 2015; 1853: 1350–1369.
- 491 5. Constant P, Poissant L, Villemur R. Annual hydrogen, carbon monoxide and  
492 carbon dioxide concentrations and surface to air exchanges in a rural area  
493 (Québec, Canada). *Atmos Environ* 2008; 42: 5090–5100.
- 494 6. Ehhalt DH, Rohrer F. The tropospheric cycle of H<sub>2</sub>: a critical review. *Tellus B*  
495 2009; 61: 500–535.
- 496 7. Morita RY. Is H<sub>2</sub> the universal energy source for long-term survival? *Microb*  
497 *Ecol* 1999; 38: 307–320.
- 498 8. Greening C, Grinter R, Chiri E. Uncovering the metabolic strategies of the  
499 dormant microbial majority: towards integrative approaches. *mSystems* 2019;  
500 4: e00107-19.
- 501 9. Vignais PM, Billoud B. Occurrence, classification, and biological function of  
502 hydrogenases: an overview. *Chem Rev* 2007; 107: 4206–4272.
- 503 10. Piché-Choquette S, Khdhiri M, Constant P. Survey of high-affinity H<sub>2</sub>-oxidizing  
504 bacteria in soil reveals their vast diversity yet underrepresentation in genomic

- 505 databases. *Microb Ecol* 2017; 74: 771–775.
- 506 11. Constant P, Poissant L, Villemur R. Isolation of *Streptomyces* sp. PCB7, the  
507 first microorganism demonstrating high-affinity uptake of tropospheric H<sub>2</sub>.  
508 *ISME J* 2008; 2: 1066–1076.
- 509 12. Constant P, Chowdhury SP, Pratscher J, Conrad R. Streptomycetes  
510 contributing to atmospheric molecular hydrogen soil uptake are widespread  
511 and encode a putative high-affinity [NiFe]-hydrogenase. *Environ Microbiol*  
512 2010; 12: 821–829.
- 513 13. Constant P, Chowdhury SP, Hesse L, Pratscher J, Conrad R. Genome data  
514 mining and soil survey for the novel Group 5 [NiFe]-hydrogenase to explore  
515 the diversity and ecological importance of presumptive high-affinity H<sub>2</sub>-  
516 oxidizing bacteria. *Appl Environ Microbiol* 2011; 77: 6027–6035.
- 517 14. Greening C, Berney M, Hards K, Cook GM, Conrad R. A soil actinobacterium  
518 scavenges atmospheric H<sub>2</sub> using two membrane-associated, oxygen-  
519 dependent [NiFe] hydrogenases. *Proc Natl Acad Sci U S A* 2014; 111: 4257–  
520 4261.
- 521 15. Greening C, Carere CR, Rushton-Green R, Harold LK, Hards K, Taylor MC, et  
522 al. Persistence of the dominant soil phylum Acidobacteria by trace gas  
523 scavenging. *Proc Natl Acad Sci U S A* 2015; 112: 10497–10502.
- 524 16. Islam ZF, Cordero PRF, Feng J, Chen YJ, Bay S, Gleadow RM, et al. Two  
525 Chloroflexi classes independently evolved the ability to persist on atmospheric  
526 hydrogen and carbon monoxide. *ISME J* 2019; 13: 1801–1813.
- 527 17. Giguere A, Meier DV, Herbold C, Richter A, Greening C, Woebken D.  
528 Acidobacteria are active and abundant members of diverse atmospheric H<sub>2</sub>-  
529 oxidizing communities detected in temperate soils. *ISME J* 2020;  
530 10.1038/s41396-020-00750–8.
- 531 18. Ji M, Greening C, Vanwonterghem I, Carere CR, Bay SK, Steen JA, et al.  
532 Atmospheric trace gases support primary production in Antarctic desert  
533 surface soil. *Nature* 2017; 552: 400–403.
- 534 19. Cordero PRF, Bayly K, Leung PM, Huang C, Islam ZF, Schittenhelm RB, et al.  
535 Atmospheric carbon monoxide oxidation is a widespread mechanism  
536 supporting microbial survival. *ISME J* 2019; 13: 2868–2881.
- 537 20. Berney M, Cook GM. Unique flexibility in energy metabolism allows  
538 mycobacteria to combat starvation and hypoxia. *PLoS One* 2010; 5: e8614.
- 539 21. Greening C, Villas-Bôas SG, Robson JR, Berney M, Cook GM. The growth  
540 and survival of *Mycobacterium smegmatis* is enhanced by co-metabolism of  
541 atmospheric H<sub>2</sub>. *PLoS One* 2014; 9: e103034.
- 542 22. Berney M, Greening C, Conrad R, Jacobs WR, Cook GM. An obligately  
543 aerobic soil bacterium activates fermentative hydrogen production to survive  
544 reductive stress during hypoxia. *Proc Natl Acad Sci U S A* 2014; 111: 11479–  
545 11484.
- 546 23. Liot Q, Constant P. Breathing air to save energy – new insights into the  
547 ecophysiological role of high-affinity [NiFe]-hydrogenase in *Streptomyces*

- 548            avermitilis. *Microbiologyopen* 2016; 5: 47–59.
- 549    24.    Meredith LK, Rao D, Bosak T, Klepac-Ceraj V, Tada KR, Hansel CM, et al.  
550    Consumption of atmospheric hydrogen during the life cycle of soil-dwelling  
551    actinobacteria. *Environ Microbiol Rep* 2014; 6: 226–38.
- 552    25.    Carere CR, Hards K, Houghton KM, Power JF, McDonald B, Collet C, et al.  
553    Mixotrophy drives niche expansion of verrucomicrobial methanotrophs. *ISME J*  
554    2017; 11: 2599–2610.
- 555    26.    Schmitz RA, Pol A, Mohammadi SS, Hogendoorn C, van Gelder AH, Jetten  
556    MSM, et al. The thermoacidophilic methanotroph *Methylophilum*  
557    *fumariolicum* SoIV oxidizes subatmospheric H<sub>2</sub> with a high-affinity, membrane-  
558    associated [NiFe] hydrogenase. *ISME J* 2020; 14: 1223–1232.
- 559    27.    Schwartz E, Fritsch J, Friedrich B. H<sub>2</sub>-Metabolizing Prokaryotes. In:  
560    Rosenberg E, DeLong EF, Lory S, Stackebrandt E, Thompson F (eds). *The*  
561    *Prokaryotes: Prokaryotic Physiology and Biochemistry*. 2013. Springer Berlin  
562    Heidelberg, Berlin, Heidelberg, pp 119–199.
- 563    28.    Ruiz-Argüeso T, Maier RJ, Evans HJ. Hydrogen evolution from alfalfa and  
564    clover nodules and hydrogen uptake by free-living *Rhizobium meliloti*. *Appl*  
565    *Environ Microbiol* 1979; 37: 582–587.
- 566    29.    Friedrich CG, Friedrich B, Bowien B. Formation of enzymes of autotrophic  
567    metabolism during heterotrophic growth of *Alcaligenes eutrophus*.  
568    *Microbiology* 1981; 122: 69–78.
- 569    30.    Nelson LM, Salminen SO. Uptake hydrogenase activity and ATP formation in  
570    *Rhizobium leguminosarum* bacteroids. *J Bacteriol* 1982; 151: 989–995.
- 571    31.    Conrad R, Aragno M, Seiler W. The inability of hydrogen bacteria to utilize  
572    atmospheric hydrogen is due to threshold and affinity for hydrogen. *FEMS*  
573    *Microbiol Lett* 1983; 18: 207–210.
- 574    32.    Häring V, Conrad R. Kinetics of H<sub>2</sub> oxidation in respiring and denitrifying  
575    *Paracoccus denitrificans*. *FEMS Microbiol Lett* 1991; 78: 259–263.
- 576    33.    Maimaiti J, Zhang Y, Yang J, Cen Y-P, Layzell DB, Peoples M, et al. Isolation  
577    and characterization of hydrogen-oxidizing bacteria induced following  
578    exposure of soil to hydrogen gas and their impact on plant growth. *Environ*  
579    *Microbiol* 2007; 9: 435–444.
- 580    34.    Pumphrey GM, Ranchou-Peyruse A, Spain JC. Cultivation-independent  
581    detection of autotrophic hydrogen-oxidizing bacteria by DNA stable-isotope  
582    probing. *Appl Environ Microbiol* 2011; 77: 4931–8.
- 583    35.    Koch H, Galushko A, Albertsen M, Schintlmeister A, Gruber-Dorninger C,  
584    Lucker S, et al. Growth of nitrite-oxidizing bacteria by aerobic hydrogen  
585    oxidation. *Science* 2014; 345: 1052–1054.
- 586    36.    Hogendoorn C, Pol A, Picone N, Cremers G, van Alen TA, Gagliano AL, et al.  
587    Hydrogen and carbon monoxide- utilizing *Kyrpidia spormannii* species from  
588    Pantelleria Island, Italy. *Front Microbiol* 2020; 11: 951.
- 589    37.    Islam ZF, Bayly K, Grinter R, Southam G, Gagen EJ, Greening C. A widely

- 590 distributed hydrogenase oxidises atmospheric H<sub>2</sub> during bacterial growth.  
591 *ISME J* 2020; 10.1038/s41396-020-0713-4.
- 592 38. Grostern A, Alvarez-Cohen L. RubisCO-based CO<sub>2</sub> fixation and C1  
593 metabolism in the actinobacterium *Pseudonocardia dioxanivorans* CB1190.  
594 *Environ Microbiol* 2013; 15: 3040–3053.
- 595 39. Hedrich S, Johnson DB. Aerobic and anaerobic oxidation of hydrogen by  
596 acidophilic bacteria. *FEMS Microbiol Lett* . 2013. England. , 349: 40–45
- 597 40. Berney M, Greening C, Hards K, Collins D, Cook GM. Three different [NiFe]  
598 hydrogenases confer metabolic flexibility in the obligate aerobe *Mycobacterium*  
599 *smegmatis*. *Environ Microbiol* 2014; 16: 318–330.
- 600 41. Cordero PRF, Grinter R, Hards K, Cryle MJ, Warr CG, Cook GM, et al. Two  
601 uptake hydrogenases differentially interact with the aerobic respiratory chain  
602 during mycobacterial growth and persistence. *J Biol Chem* 2019; 294: 18980–  
603 18991.
- 604 42. Park SS, DeCicco BT. Autotrophic growth with hydrogen of *Mycobacterium*  
605 *gordonae* and another scotochromogenic mycobacterium. *Int J Syst Evol*  
606 *Microbiol* 1974; 24: 338–345.
- 607 43. Schmidt U. Molecular hydrogen in the atmosphere. *Tellus* 1974; 26: 78–90.
- 608 44. Novelli PC, Lang PM, Masarie A, Hurst DF, Elkins W, Masarie KA, et al.  
609 Molecular hydrogen in the troposphere: global distribution and budget. *J*  
610 *Geophys Res Atmos* 1999; 104: 30427–30444.
- 611 45. Myers MR, King GM. Isolation and characterization of *Acidobacterium ailaui*  
612 sp. nov., a novel member of Acidobacteria subdivision 1, from a geothermally  
613 heated Hawaiian microbial mat. *Int J Syst Evol Microbiol* 2016; 66: 5328–5335.
- 614 46. Conrad R, Seiler W. Decomposition of atmospheric hydrogen by soil  
615 microorganisms and soil enzymes. *Soil Biol Biochem* 1981; 13: 43–49.
- 616 47. Constant P, Chowdhury SP, Hesse L, Conrad R. Co-localization of  
617 atmospheric H<sub>2</sub> oxidation activity and high affinity H<sub>2</sub>-oxidizing bacteria in non-  
618 axenic soil and sterile soil amended with *Streptomyces* sp. PCB7. *Soil Biol*  
619 *Biochem* 2011; 43: 1888–1893.
- 620 48. Greening C, Constant P, Hards K, Morales SE, Oakeshott JG, Russell RJ, et  
621 al. Atmospheric hydrogen scavenging: from enzymes to ecosystems. *Appl*  
622 *Environ Microbiol* 2015; 81: 1190–1199.
- 623 49. Conrad R. Soil microorganisms as controllers of atmospheric trace gases (H<sub>2</sub>,  
624 CO, CH<sub>4</sub>, OCS, N<sub>2</sub>O, and NO). *Microbiol Rev* 1996; 60: 609–640.
- 625 50. Constant P, Poissant L, Villemur R. Tropospheric H<sub>2</sub> budget and the response  
626 of its soil uptake under the changing environment. *Sci Total Environ* 2009; 407:  
627 1809–1823.
- 628 51. Lynch RC, Darcy JL, Kane NC, Nemergut DR, Schmidt SK. Metagenomic  
629 evidence for metabolism of trace atmospheric gases by high-elevation desert  
630 Actinobacteria. *Front Microbiol* 2014; 5: 698.

- 631 52. Jordaan K, Lappan R, Dong X, Aitkenhead IJ, Bay SK, Chiri E, et al.  
632 Hydrogen-oxidising bacteria are abundant in desert soils and strongly  
633 stimulated by hydration. *mSystems* 2020; In press.
- 634 53. Rhee TS, Brenninkmeijer CM, Röckmann T. The overwhelming role of soils in  
635 the global atmospheric hydrogen cycle. *Atmos Chem Phys Discuss* 2005; 5:  
636 11215–11248.
- 637 54. Witty JF. Microelectrode measurements of hydrogen concentrations and  
638 gradients in legume nodules. *J Exp Bot* 1991; 42: 765–771.
- 639 55. La Favre JS, Focht DD. Conservation in soil of H<sub>2</sub> liberated from N<sub>2</sub> fixation by  
640 Hup-nodules. *Appl Environ Microbiol* 1983; 46: 304–311.
- 641 56. Peoples MB, McLennan PD, Brockwell J. Hydrogen emission from nodulated  
642 soybeans [*Glycine max* (L.) Merr.] and consequences for the productivity of a  
643 subsequent maize (*Zea mays* L.) crop. *Plant Soil* 2008; 307: 67–82.
- 644 57. Osborne CA, Peoples MB, Janssen PH. Detection of a reproducible, single-  
645 member shift in soil bacterial communities exposed to low levels of hydrogen.  
646 *Appl Environ Microbiol* 2010; 76: 1471–1479.
- 647 58. de la Porte A, Schmidt R, Yergeau É, Constant P. A gaseous milieu: extending  
648 the boundaries of the rhizosphere. *Trends Microbiol* 2020; 28: 536–542.
- 649 59. Dean CA, Sun W, Dong Z, Caldwell CD. Soybean nodule hydrogen  
650 metabolism affects soil hydrogen uptake and growth of rotation crops. *Can J*  
651 *Plant Sci* 2006; 86: 1355–1359.
- 652 60. Wang X, Teng Y, Tu C, Luo Y, Greening C, Zhang N, et al. Coupling between  
653 nitrogen fixation and tetrachlorobiphenyl dechlorination in a rhizobium-legume  
654 symbiosis. *Environ Sci Technol* 2018; 52.
- 655 61. Xu Y, Teng Y, Wang X, Li R, Christie P. Exploring bacterial community  
656 structure and function associated with polychlorinated biphenyl biodegradation  
657 in two hydrogen-amended soils. *Sci Total Environ* 2020; 745: 140839.
- 658 62. Teng Y, Xu Y, Wang X, Christie P. Function of biohydrogen metabolism and  
659 related microbial communities in environmental bioremediation. *Front Microbiol*  
660 2019; 10: 106.
- 661 63. Tromp TK, Shia R-L, Allen M, Eiler JM, Yung YL. Potential environmental  
662 impact of a hydrogen economy on the stratosphere. *Science* 2003; 300: 1740–  
663 1742.
- 664 64. Schultz MG, Diehl T, Brasseur GP, Zittel W. Air pollution and climate-forcing  
665 impacts of a global hydrogen economy. *Science* 2003; 302: 624–627.
- 666 65. Schuler S, Conrad R. Soils contain two different activities for oxidation of  
667 hydrogen. *FEMS Microbiol Lett* 1990; 73: 77–83.
- 668 66. Häring V, Conrad R. Demonstration of two different H<sub>2</sub>-oxidizing activities in  
669 soil using an H<sub>2</sub> consumption and a tritium exchange assay. *Biol Fertil Soils*  
670 1994; 17: 125–128.
- 671 67. Piché-Choquette S, Tremblay J, Tringe SG, Constant P. H<sub>2</sub>-saturation of high

- 672 affinity H<sub>2</sub>-oxidizing bacteria alters the ecological niche of soil microorganisms  
673 unevenly among taxonomic groups. *PeerJ* 2016; 4: e1782.
- 674 68. Dong Z, Layzell DB. H<sub>2</sub> oxidation, O<sub>2</sub> uptake and CO<sub>2</sub> fixation in hydrogen  
675 treated soils. *Plant Soil* 2001; 229: 1–12.
- 676 69. McLearn N, Dong Z. Microbial nature of the hydrogen-oxidizing agent in  
677 hydrogen-treated soil. *Biol Fertil Soils* 2002; 35: 465–469.
- 678 70. Piché-Choquette S, Khdhiri M, Constant P. Dose-response relationships  
679 between environmentally-relevant H<sub>2</sub> concentrations and the biological sinks of  
680 H<sub>2</sub>, CH<sub>4</sub> and CO in soil. *Soil Biol Biochem* 2018; 123: 190–199.
- 681 71. Zhang Y, He X, Dong Z. Effect of hydrogen on soil bacterial community  
682 structure in two soils as determined by terminal restriction fragment length  
683 polymorphism. *Plant Soil* 2009; 320: 295–305.
- 684 72. Khdhiri M, Piché-Choquette S, Tremblay J, Tringe SG, Constant P. The tale of  
685 a neglected energy source: Elevated hydrogen exposure affects both microbial  
686 diversity and function in soil. *Appl Environ Microbiol* 2017; 83.
- 687 73. Khdhiri M, Hesse L, Popa ME, Quiza L, Lalonde I, Meredith LK, et al. Soil  
688 carbon content and relative abundance of high affinity H<sub>2</sub>-oxidizing bacteria  
689 predict atmospheric H<sub>2</sub> soil uptake activity better than soil microbial community  
690 composition. *Soil Biol Biochem* 2015; 85: 1–9.
- 691 74. Khdhiri M, Piché-Choquette S, Tremblay J, Tringe SG, Constant P. Meta-  
692 omics survey of [NiFe]-hydrogenase genes fails to capture drastic variations in  
693 H<sub>2</sub>-oxidation activity measured in three soils exposed to H<sub>2</sub>. *Soil Biol Biochem*  
694 2018; 125: 239–243.
- 695 75. Wang X-B, Schmidt R, Yergeau É, Constant P. Field H<sub>2</sub> infusion alters  
696 bacterial and archaeal communities but not fungal communities nor nitrogen  
697 cycle gene abundance. *Soil Biol Biochem* 2020; 108018.
- 698 76. Janssen PH. Identifying the dominant soil bacterial taxa in libraries of 16S  
699 rRNA and 16S rRNA genes. *Appl Environ Microbiol* 2006; 72: 1719–1728.
- 700 77. Delgado-Baquerizo M, Oliverio AM, Brewer TE, Benavent-González A,  
701 Eldridge DJ, Bardgett RD, et al. A global atlas of the dominant bacteria found  
702 in soil. *Science* 2018; 359: 320–325.
- 703 78. Ortiz M, Leung PM, Shelley G, Von Goethem MW, Bay SK, Jordaan K, et al. A  
704 genome compendium reveals diverse metabolic adaptations of Antarctic soil  
705 microorganisms. *bioRxiv* 2020; 10.1101/2020.08.06.239558.
- 706 79. Brown CT, Hug LA, Thomas BC, Sharon I, Castelle CJ, Singh A, et al. Unusual  
707 biology across a group comprising more than 15% of domain *Bacteria*. *Nature*  
708 2015; 523: 208–211.
- 709 80. Søndergaard D, Pedersen CNS, Greening C. HydDB: a web tool for  
710 hydrogenase classification and analysis. *Sci Rep* 2016; 6: 34212.
- 711 81. Tabita FR, Satagopan S, Hanson TE, Kreel NE, Scott SS. Distinct form I, II, III,  
712 and IV Rubisco proteins from the three kingdoms of life provide clues about  
713 Rubisco evolution and structure/function relationships. *J Exp Bot* 2008; 59:

- 714 1515–1524.
- 715 82. Fritsch J, Lenz O, Friedrich B. Structure, function and biosynthesis of O<sub>2</sub>-  
716 tolerant hydrogenases. *Nat Rev Microbiol* 2013; 11: 106.
- 717 83. King GM. Uptake of carbon monoxide and hydrogen at environmentally  
718 relevant concentrations by Mycobacteria. *Appl Environ Microbiol* 2003; 69:  
719 7266–7272.
- 720 84. Gomila M, Ramirez A, Gasco J, Lalucat J. *Mycobacterium llatzerense* sp. nov.,  
721 a facultatively autotrophic, hydrogen-oxidizing bacterium isolated from  
722 haemodialysis water. *Int J Syst Evol Microbiol* 2008; 58: 2769–2773.
- 723 85. Ishii S, Ashida N, Ohno H, Segawa T, Yabe S, Otsuka S, et al.  
724 *Noviherbaspirillum denitrificans* sp. nov., a denitrifying bacterium isolated from  
725 rice paddy soil and *Noviherbaspirillum autotrophicum* sp. nov., a denitrifying,  
726 facultatively autotrophic bacterium isolated from rice paddy soil and proposal t.  
727 *Int J Syst Evol Microbiol* 2017; 67: 1841–1848.
- 728 86. Greening C, Cook GM. Integration of hydrogenase expression and hydrogen  
729 sensing in bacterial cell physiology. *Curr Opin Microbiol* 2014; 18: 30–8.
- 730 87. Lenz O, Friedrich B. A novel multicomponent regulatory system mediates H<sub>2</sub>  
731 sensing in *Alcaligenes eutrophus*. *Proc Natl Acad Sci U S A* 1998; 95: 12474–  
732 12479.
- 733 88. Ren G, Teng Y, Ren W, Dai S, Li Z. Pyrene dissipation potential varies with  
734 soil type and associated bacterial community changes. *Soil Biol Biochem* 2016;  
735 103: 71–85.
- 736 89. Xu Y, Dai S, Meng K, Wang Y, Ren W, Zhao L, et al. Occurrence and risk  
737 assessment of potentially toxic elements and typical organic pollutants in  
738 contaminated rural soils. *Sci Total Environ* 2018; 630: 618–629.
- 739 90. Huang G, Zhao L, Dong Y, Zhang Q. Remediation of soils contaminated with  
740 polychlorinated biphenyls by microwave-irradiated manganese dioxide. *J*  
741 *Hazard Mater* 2011; 186: 128–132.
- 742 91. Wang S, Chng KR, Wilm A, Zhao S, Yang K-L, Nagarajan N, et al. Genomic  
743 characterization of three unique *Dehalococcoides* that respire on persistent  
744 polychlorinated biphenyls. *Proc Natl Acad Sci* 2014; 111: 12103–12108.
- 745 92. Li J-Y, Jin X-Y, Zhang X-C, Chen L, Liu J-L, Zhang H-M, et al. Comparative  
746 metagenomics of two distinct biological soil crusts in the Tengger Desert,  
747 China. *Soil Biol Biochem* 2020; 140: 107637.
- 748 93. Callahan BJ, McMurdie PJ, Rosen MJ, Han AW, Johnson AJA, Holmes SP.  
749 DADA2: High-resolution sample inference from Illumina amplicon data. *Nat*  
750 *Methods* 2016; 13: 581–583.
- 751 94. Bay SK, McGeoch MA, Gillor O, Wieler N, Palmer DJ, Baker DJ, et al. Soil  
752 bacterial communities exhibit strong biogeographic patterns at fine taxonomic  
753 resolution. *mSystems* 2020; 5: e00540-20.
- 754 95. Wang Q, Garrity GM, Tiedje JM, Cole JR. Naive Bayesian classifier for rapid  
755 assignment of rRNA sequences into the new bacterial taxonomy. *Appl Environ*

- 756 *Microbiol* 2007; 73: 5261–5267.
- 757 96. Bolyen E, Rideout JR, Dillon MR, Bokulich NA, Abnet CC, Al-Ghalith GA, et al.  
758 Reproducible, interactive, scalable and extensible microbiome data science  
759 using QIIME 2. *Nat Biotechnol* 2019; 37: 852–857.
- 760 97. Boyd JA, Woodcroft BJ, Tyson GW. GraftM: a tool for scalable,  
761 phylogenetically informed classification of genes within metagenomes. *Nucleic*  
762 *Acids Res* 2018; 46: e59–e59.
- 763 98. Uritskiy GV, DiRuggiero J, Taylor J. MetaWRAP—a flexible pipeline for  
764 genome-resolved metagenomic data analysis. *Microbiome* 2018; 6, 158.
- 765 99. Li D, Luo R, Liu C, Leung C, Ting H, Sadakane K, et al. A fast and scalable  
766 metagenome assembler driven by advanced methodologies and community  
767 practices. *Methods* 2016; 102, 3–11.
- 768 100. Olm MR, Brown CT, Brooks B, Banfield JF. dRep: a tool for fast and accurate  
769 genomic comparisons that enables improved genome recovery from  
770 metagenomes through de-replication. *ISME J* 2017; 11: 2864.
- 771 101. Parks DH, Imelfort M, Skennerton CT, Hugenholtz P, Tyson GW. CheckM:  
772 assessing the quality of microbial genomes recovered from isolates, single  
773 cells, and metagenomes. *Genome Res* 2015; 25: 1043–1055.
- 774 102. Chaumeil P-A, Mussig AJ, Hugenholtz P, Parks DH. GTDB-Tk: a toolkit to  
775 classify genomes with the Genome Taxonomy Database. *Bioinformatics* 2020;  
776 36: 1925–1927.
- 777 103. Dong X, Rattray JE, Campbell DC, Webb J, Chakraborty A, Adebayo O, et al.  
778 Thermogenic hydrocarbons fuel a redox stratified subseafloor microbiome in  
779 deep sea cold seep sediments. *Nat Commun* 2020;  
780 <https://doi.org/10.1038/s41467-020-19648-2>
- 781 104. Buchfink B, Xie C, Huson DH. Fast and sensitive protein alignment using  
782 DIAMOND. *Nat Methods* 2014; 12: 59.
- 783 105. Lawson CE, Wu S, Bhattacharjee AS, Hamilton JJ, McMahon KD, McMahon  
784 KD, Goel R, et al.,  
785 Metabolic network analysis reveals microbial community interactions in anamm  
786 ox granules. *Nat Commun* 2017; 8(1): 1–12.
- 787 106. Hyatt D, Chen GL, LoCascio PF, Land ML, Larimer FW, Hauser LJ. Prodigal:  
788 prokaryotic gene recognition and translation initiation site identification.  
789 *Bioinformatics* 2010; 11(1): 119.
- 790 107. Kanehisa M, Sato Y, Morishima K. BlastKOALA and GhostKOALA: KEGG  
791 tools for functional characterization of genome and metagenome sequences. *J*  
792 *Mol Biol* 2016; 428: 726–731.
- 793 108. Katoh K, Misawa K, Kuma KI, Miyata T. MAFFT: A novel method for rapid  
794 multiple sequence alignment based on fast Fourier transform. *Nucleic Acids*  
795 *Res* 2002; 30: 3059–3066.
- 796 109. Wong HL, White RA, Visscher PT, Charlesworth JC, Vázquez-Campos X,  
797 Burns BP. Disentangling the drivers of functional complexity at the



- 798 metagenomic level in Shark Bay microbial mat microbiomes. *ISME J* 2018; 12:  
799 2619–2639.
- 800 110. Letunic I, Bork P. Interactive tree of life (iTOL) v3: an online tool for the display  
801 and annotation of phylogenetic and other trees. *Nucleic Acids Res* 2016; 44:  
802 W242–W245.
- 803 111. Kumar S, Stecher G, Tamura K. MEGA7: molecular evolutionary genetics  
804 analysis version 7.0 for bigger datasets. *Mol Biol Evol* 2016; 33(7), 1870–1874.

## 805 **Supplementary information**

806 Supplementary information (Figure S1-S7; Table S1-S11; Supplementary text and  
807 Supplementary Tables (xlsx)) accompanies this paper.

## 808 **Acknowledgments**

809 This study is funded by the National Key Research and Development Program of  
810 China (2019YFC1803700) and the National Natural Science Foundation of China  
811 (Grant Nos. 41671327). C.G. is supported by an ARC DECRA Fellowship  
812 (DE170100310) and an NHMRC EL2 Fellowship (APP1178715). X.D. is supported  
813 by National Natural Science Foundation of China (Grant no. 41906076) and the  
814 Fundamental Research Funds for the Central Universities (Grant no. 19lgpy90).

## 815 **Author contributions**

816 Y.X., Y.T., and Y.L. conceived and supervised this study. Y.X., Y.T., and X.W.  
817 designed and performed experiments. Y.X., X.D., Y.T., C.Z., and C.G. were  
818 responsible for meta-omic analysis. Y.X., X.D., and C.G. analysed data. L.Z. and  
819 W.R. provided critical comments on this study. Y.X., Y.T., X.D., and C.G. wrote the  
820 paper with input from all authors.

## 821 **Data availability statement**

822 The 16S rRNA gene amplicon sequences have been deposited in the Sequence  
823 Read Archive (SRA) of the NCBI with accession number PRJNA639898. The  
824 metagenomes have been deposited in the NCBI SRA with accession number  
825 PRJNA640224.

## 826 **Abbreviation list**

827 SOM, soil organic matter content; TN, total nitrogen; TP, total phosphorus; TK, total  
828 potassium; AN, alkali-hydrolyzable nitrogen; AP, available phosphorus; AK,  
829 available potassium.

## 830 **Ethics approval and consent to participate**

831 Not applicable.

832 **Consent for publication**

833 Not applicable.

834 **Competing interests**

835 The authors declare no conflict of interest.

836 **Statement**

837 We confirm we have included a statement regarding data and material availability in  
838 the declaration section of our manuscript.

839 **Tables and Figures**840 **Table 1.** Edaphic properties and PCB degradation rate in different treatments after 84 days.

| Soil           | H <sub>2</sub> levels | PCB deg. rate   | pH             | SOM                | TN                 | TP                 | TK                 | AN                  | AP                  | AK                  |
|----------------|-----------------------|-----------------|----------------|--------------------|--------------------|--------------------|--------------------|---------------------|---------------------|---------------------|
| type           | ppmv                  | %               |                | g·kg <sup>-1</sup> | g·kg <sup>-1</sup> | g·kg <sup>-1</sup> | g·kg <sup>-1</sup> | mg·kg <sup>-1</sup> | mg·kg <sup>-1</sup> | mg·kg <sup>-1</sup> |
| <b>Wetland</b> | <b>0.5</b>            | 35.29 ± 1.44 d  | 6.94 ± 0.08 a  | 15.19 ± 0.37 a     | 1.09 ± 0.05 a      | 0.72 ± 0.04 a      | 18.61 ± 0.62 ab    | 95.55 ± 7.35 a      | 11.18 ± 0.32 b      | 110.83 ± 1.44 b     |
|                | <b>50</b>             | 38.90 ± 1.17 cd | 6.74 ± 0.02 b  | 15.77 ± 1.22 a     | 1.00 ± 0.02 c      | 0.71 ± 0.02 a      | 18.81 ± 0.32 a     | 85.75 ± 11.23 a     | 12.03 ± 0.65 ab     | 116.67 ± 7.22 ab    |
|                | <b>500</b>            | 40.57 ± 2.78 bc | 6.62 ± 0.05 d  | 16.15 ± 0.30 a     | 1.01 ± 0.05 c      | 0.74 ± 0.02 a      | 18.26 ± 0.38 ab    | 88.32 ± 0.20 a      | 12.09 ± 0.38 ab     | 109.17 ± 3.82 b     |
|                | <b>5000</b>           | 47.95 ± 2.44 a  | 6.66 ± 0.03 cd | 15.10 ± 0.15 a     | 1.04 ± 0.02 ab     | 0.70 ± 0.04 a      | 17.45 ± 0.08 b     | 88.20 ± 7.35 a      | 12.64 ± 1.03 a      | 116.67 ± 3.82 ab    |
|                | <b>20000</b>          | 42.94 ± 0.98 b  | 6.73 ± 0.01 bc | 15.92 ± 0.37 a     | 1.05 ± 0.02 ab     | 0.74 ± 0.04 a      | 18.60 ± 0.21 ab    | 93.10 ± 11.23 a     | 11.67 ± 0.70 ab     | 122.50 ± 6.61 a     |
|                | <b>50000</b>          | 47.60 ± 1.59 a  | 6.61 ± 0.03 d  | 16.25 ± 0.55 a     | 1.03 ± 0.04 ab     | 0.70 ± 0.06 a      | 17.40 ± 1.47 b     | 90.65 ± 4.24 a      | 11.34 ± 0.62 b      | 113.33 ± 1.44 b     |
| <b>Upland</b>  | <b>0.5</b>            | 46.56 ± 1.92 ab | 5.12 ± 0.01 a  | 34.02 ± 0.90 a     | 2.40 ± 0.01 a      | 0.79 ± 0.01 ab     | 21.58 ± 0.07 a     | 196.00 ± 8.49 a     | 50.30 ± 1.11 a      | 140.09 ± 2.53 a     |
|                | <b>50</b>             | 42.85 ± 0.39 b  | 4.93 ± 0.06 b  | 32.59 ± 0.58 b     | 2.33 ± 0.01 a      | 0.81 ± 0.01 a      | 22.44 ± 0.43 a     | 196.00 ± 4.24 a     | 49.95 ± 1.87 a      | 140.00 ± 2.50 a     |
|                | <b>500</b>            | 47.88 ± 2.76 a  | 4.78 ± 0.03 c  | 32.35 ± 0.32 b     | 2.34 ± 0.03 a      | 0.79 ± 0.02 ab     | 21.66 ± 0.27 a     | 198.45 ± 7.35 a     | 51.50 ± 0.97 a      | 140.83 ± 3.82 a     |
|                | <b>5000</b>           | 43.89 ± 2.03 ab | 4.71 ± 0.02 d  | 32.34 ± 0.20 b     | 2.19 ± 0.28 a      | 0.77 ± 0.02 b      | 22.27 ± 0.27 a     | 193.55 ± 11.23 a    | 48.99 ± 0.90 a      | 140.83 ± 3.82 a     |
|                | <b>20000</b>          | 43.58 ± 2.67 b  | 4.69 ± 0.01 d  | 33.72 ± 0.17 a     | 2.33 ± 0.07 a      | 0.79 ± 0.04 ab     | 22.50 ± 0.94 a     | 210.70 ± 21.22 a    | 49.73 ± 1.35 a      | 140.18 ± 3.21 a     |
|                | <b>50000</b>          | 45.22 ± 1.95 ab | 4.72 ± 0.01 d  | 33.93 ± 0.64 a     | 2.39 ± 0.02 a      | 0.80 ± 0.02 ab     | 22.23 ± 0.38 a     | 198.45 ± 7.35 a     | 49.90 ± 1.79 a      | 140.00 ± 2.18 a     |

841 PCB77 degradation rate = (initial concentration - residual concentration - sterile control concentration) / initial concentration\*100%. The  
842 abbreviations SOM, TN, TP, TK, AN, AP, and AK referred to soil organic matter, total nitrogen, total phosphorus, total potassium, alkali-  
843 hydrolysable nitrogen, available phosphorus, and available potassium, respectively. The designations 0.5, 50, 500, 5,000, 20,000 and  
844 50,000 denote the different mixing ratios of H<sub>2</sub> that each microcosm was treated with (in ppmv). Each value is the mean of three  
845 replicates ± standard deviation. The same letter indicates no significant difference ( $p < 0.05$ ), as calculated from Duncan's multiple range  
846 test.

847 **Figure 1. Changes of community abundance, diversity, and composition**  
848 **during the soil microcosms (a)** Stacked bar chart showing the estimated  
849 abundance of bacterial and archaeal taxa based on 16S rRNA gene copy number;  
850 Boxplot showing Shannon index of microbial communities based on 16S rRNA gene  
851 amplicon sequence variants. **(b)** The relationship between H<sub>2</sub> mixing ratio, soil  
852 physicochemical properties, and beta diversity are visualised by db-RDA. *p* values  
853 are denoted by asterisks (\* *p* < 0.05, \*\* *p* < 0.01, \*\*\* *p* < 0.001). Results of marginal  
854 permutation tests of db-RDA are shown in **Table S1**. **(c)** Relative abundance of the  
855 taxa at the phylum level based on 16S rRNA gene amplicon sequencing and  
856 metagenome analysis. **(d)** Differences in relative abundance of key genera between  
857 the elevated H<sub>2</sub>-treated soils and control soils (0.5 ppmv H<sub>2</sub> treatment) based on 16S  
858 rRNA gene amplicon sequencing and metagenome analysis. The percent values in  
859 parentheses refer to the relative abundance of the phylotype in the control soil. Only  
860 taxa are shown which significantly increased or decreased in relative abundance by  
861 at least 1% in the treatment versus control microcosms, where \* indicates *p* < 0.05  
862 (one-way ANOVA with Duncan's test).-

863 **Figure 2. Phylogenetic tree of 196 assembled contaminated soil microbial**  
864 **MAGs.** The average abundance of each MAG in the corresponding hydrogen  
865 treatments in contaminated soil is shown in the outer circle heatmap. Taxonomy  
866 classification at the phylum level is shown in the inner circle across the 196 MAGs  
867 spanning 24 phyla. The square indicates MAGs that encode a group 1 or 2 [NiFe]-  
868 hydrogenase, the circles indicate MAGs that encode a RuBisCO, and the stars  
869 indicate MAGs that encode PCB degradation pathways. The triangle (left triangle,  
870 wetland; right triangle, upland) denotes on the diagram those taxa that are  
871 significantly changed following H<sub>2</sub> treatment; Filled symbol indicates significantly  
872 enriched MAGs, and symbol with border only indicates significantly decreased  
873 MAGs.

874 **Figure 3. Changes of metabolic potential of the microbial communities in**  
875 **contaminated soils.** To infer gene abundance in metagenomes, read counts were  
876 normalized to gene length and the abundance of 14 single-copy marker genes; while  
877 the abundance of the right heatmap were normalized by predicted MAG  
878 completeness.

879 **Figure 4. Effect of hydrogen on PCB degradation genes and activities in**  
880 **contaminated soils. (a)** Metabolic pathways in four MAGs (with > 90%  
881 completeness and < 5% contamination) predicted to mediate PCB degradation.  
882 Predicted proteins in the figure are listed in **Table S7 and Table S11. (b)** Changes  
883 of residual PCB77 concentrations in the wetland and upland soils during the  
884 incubation period.

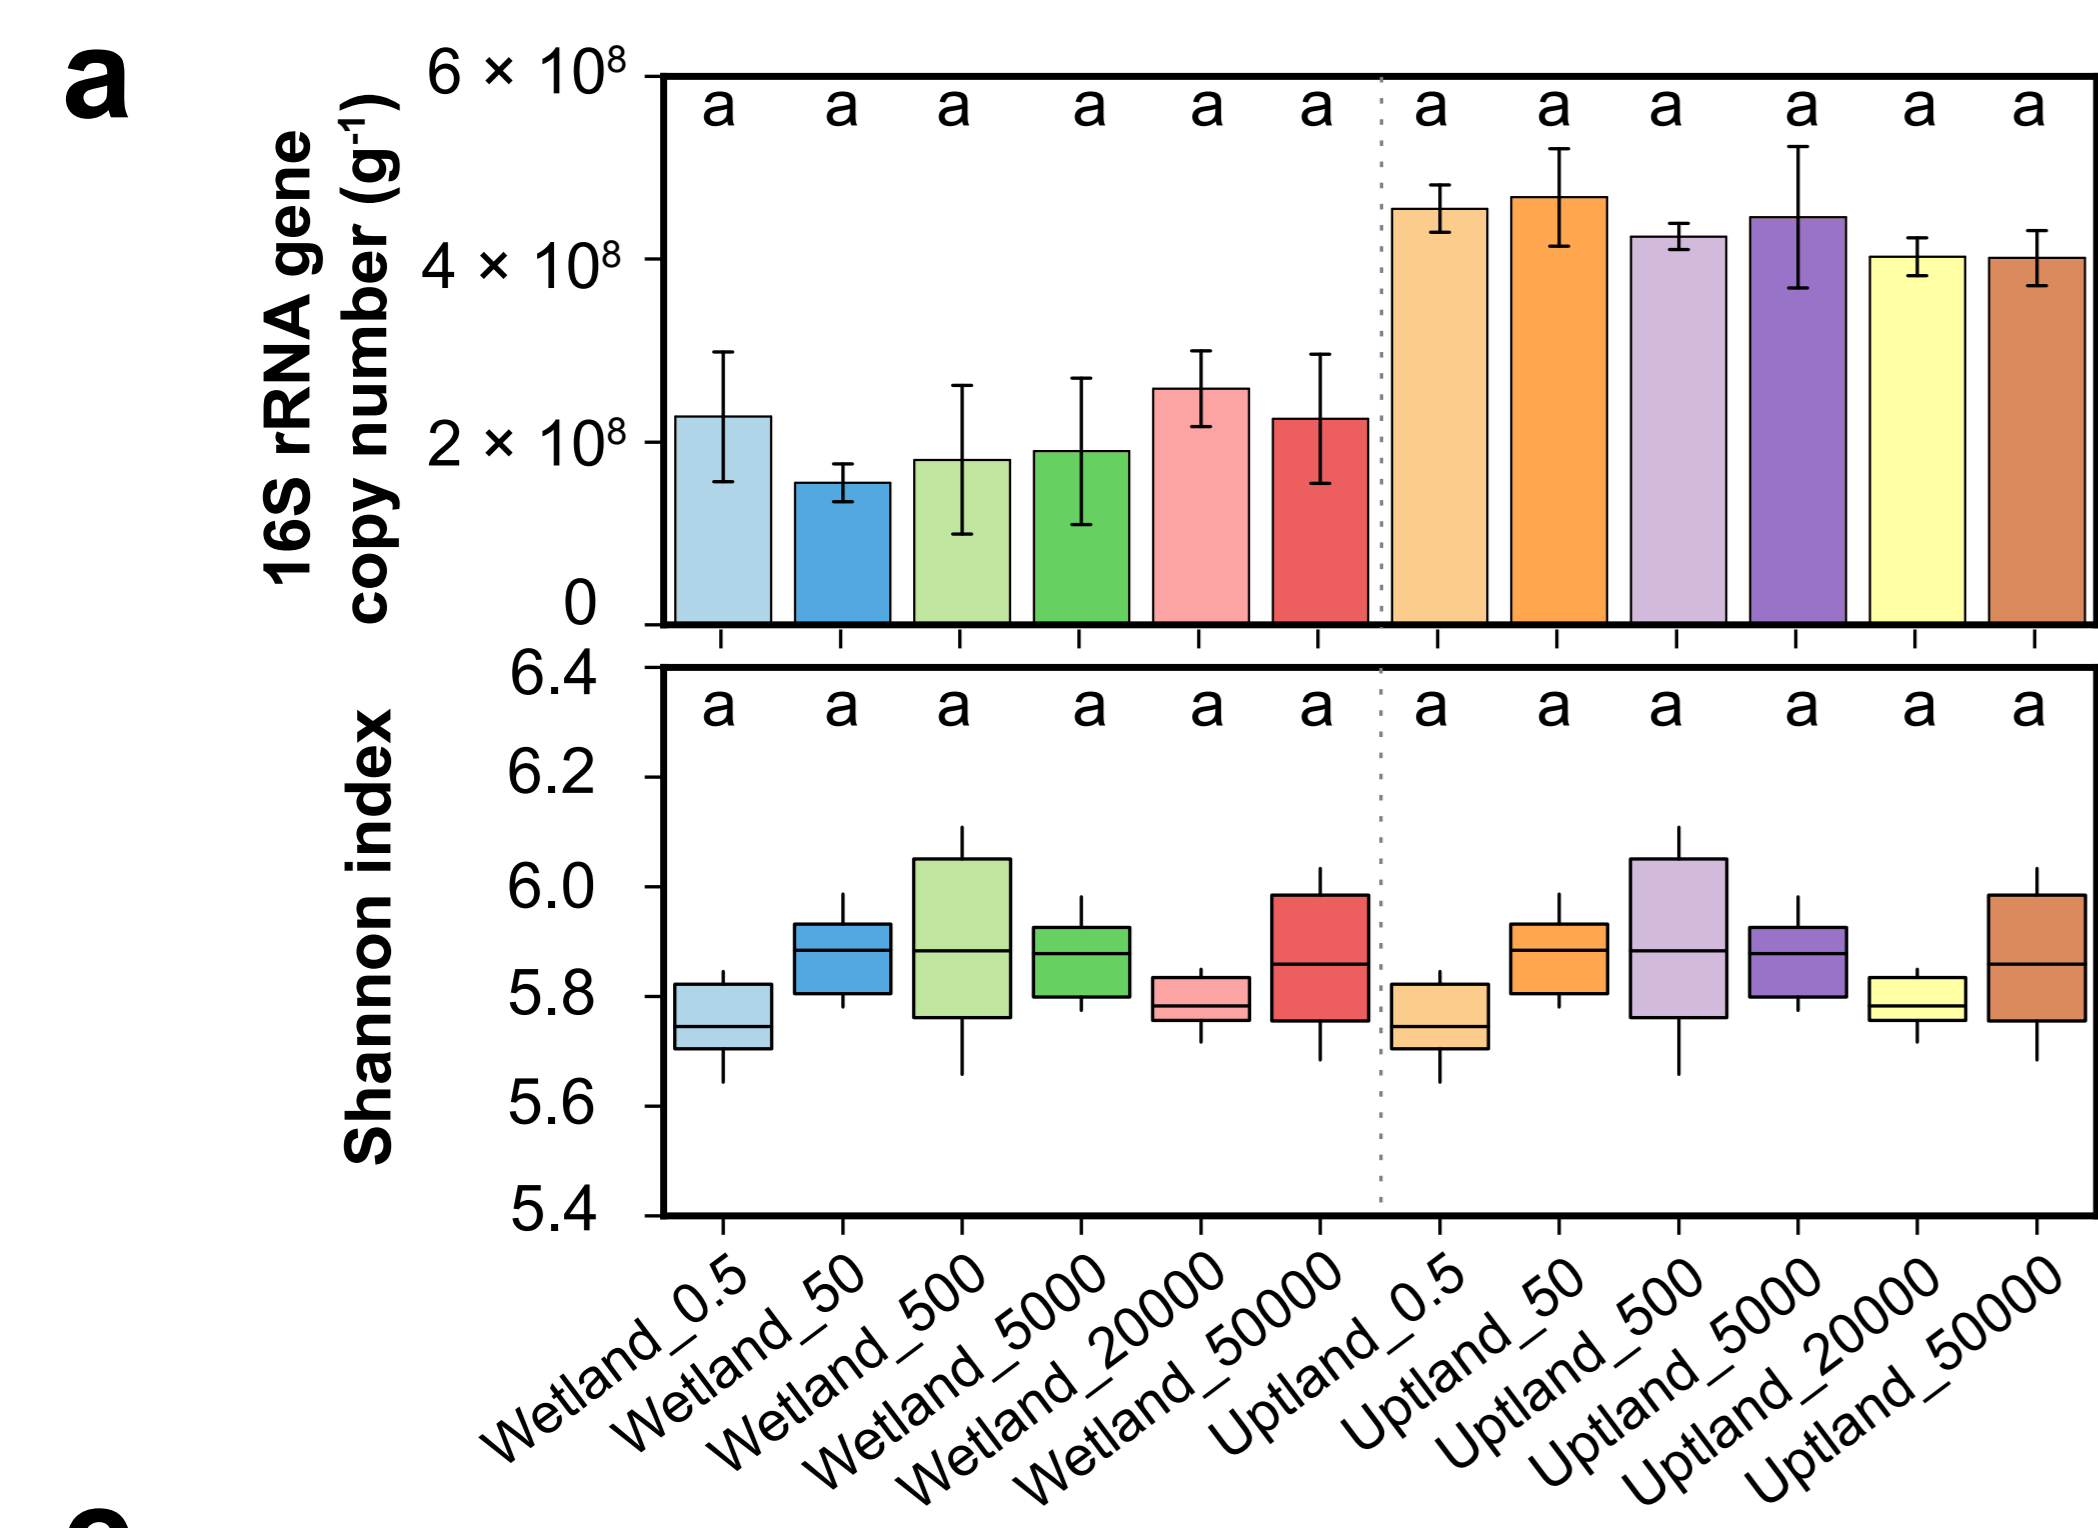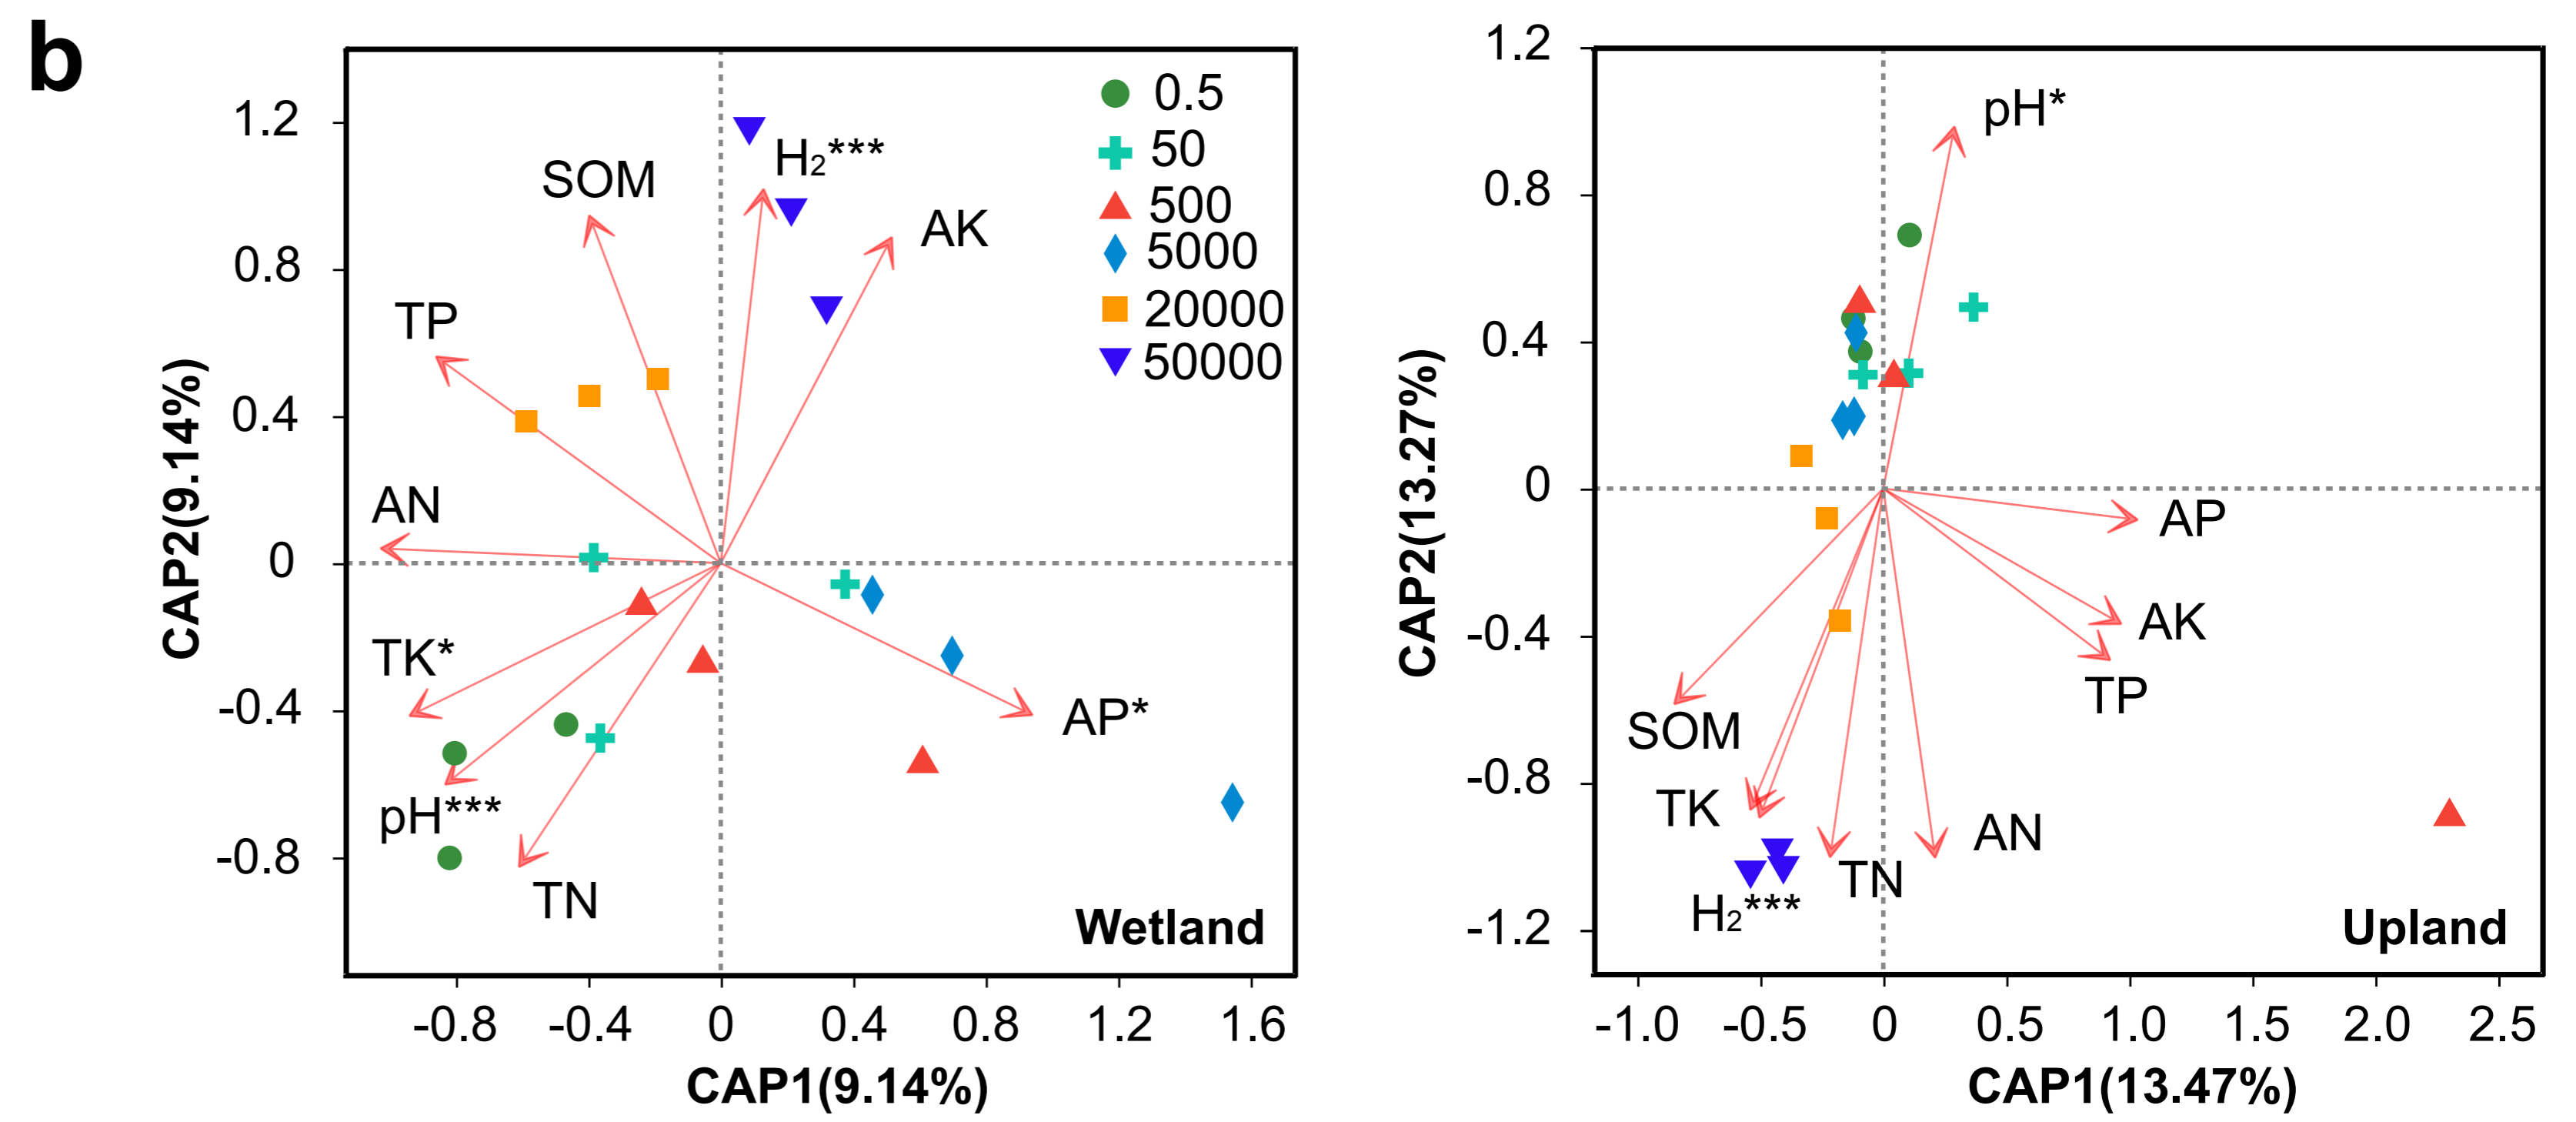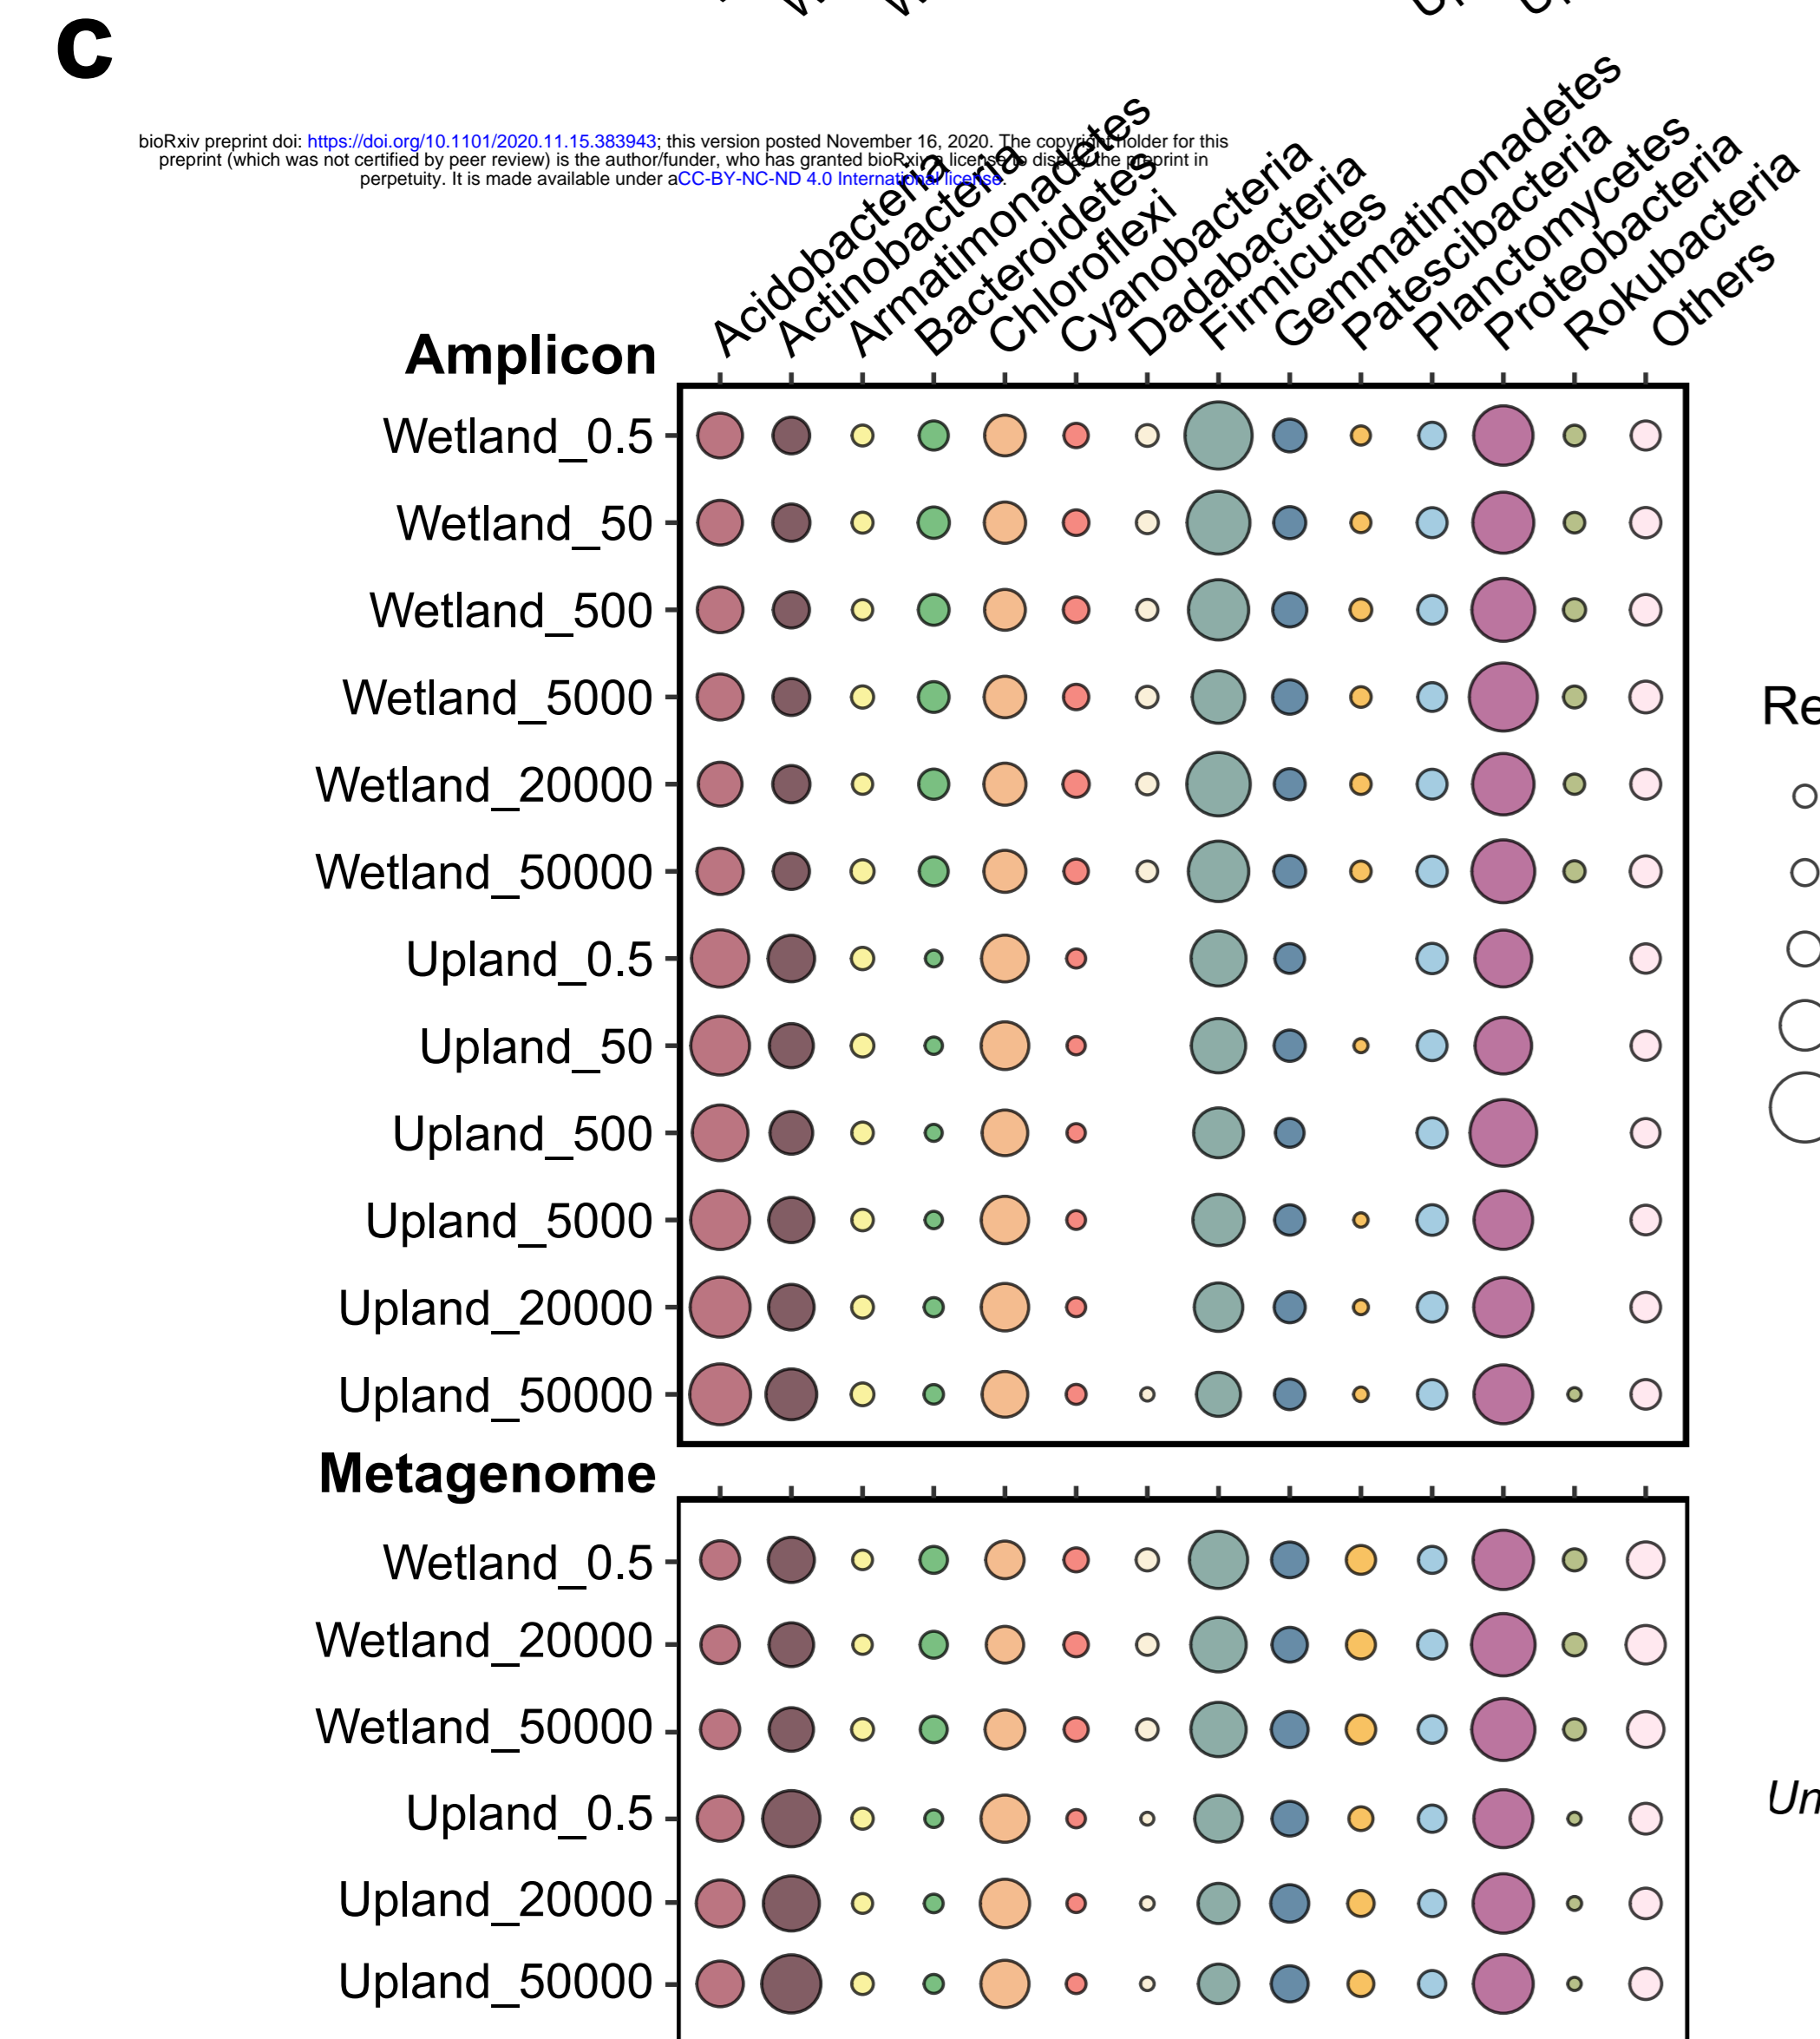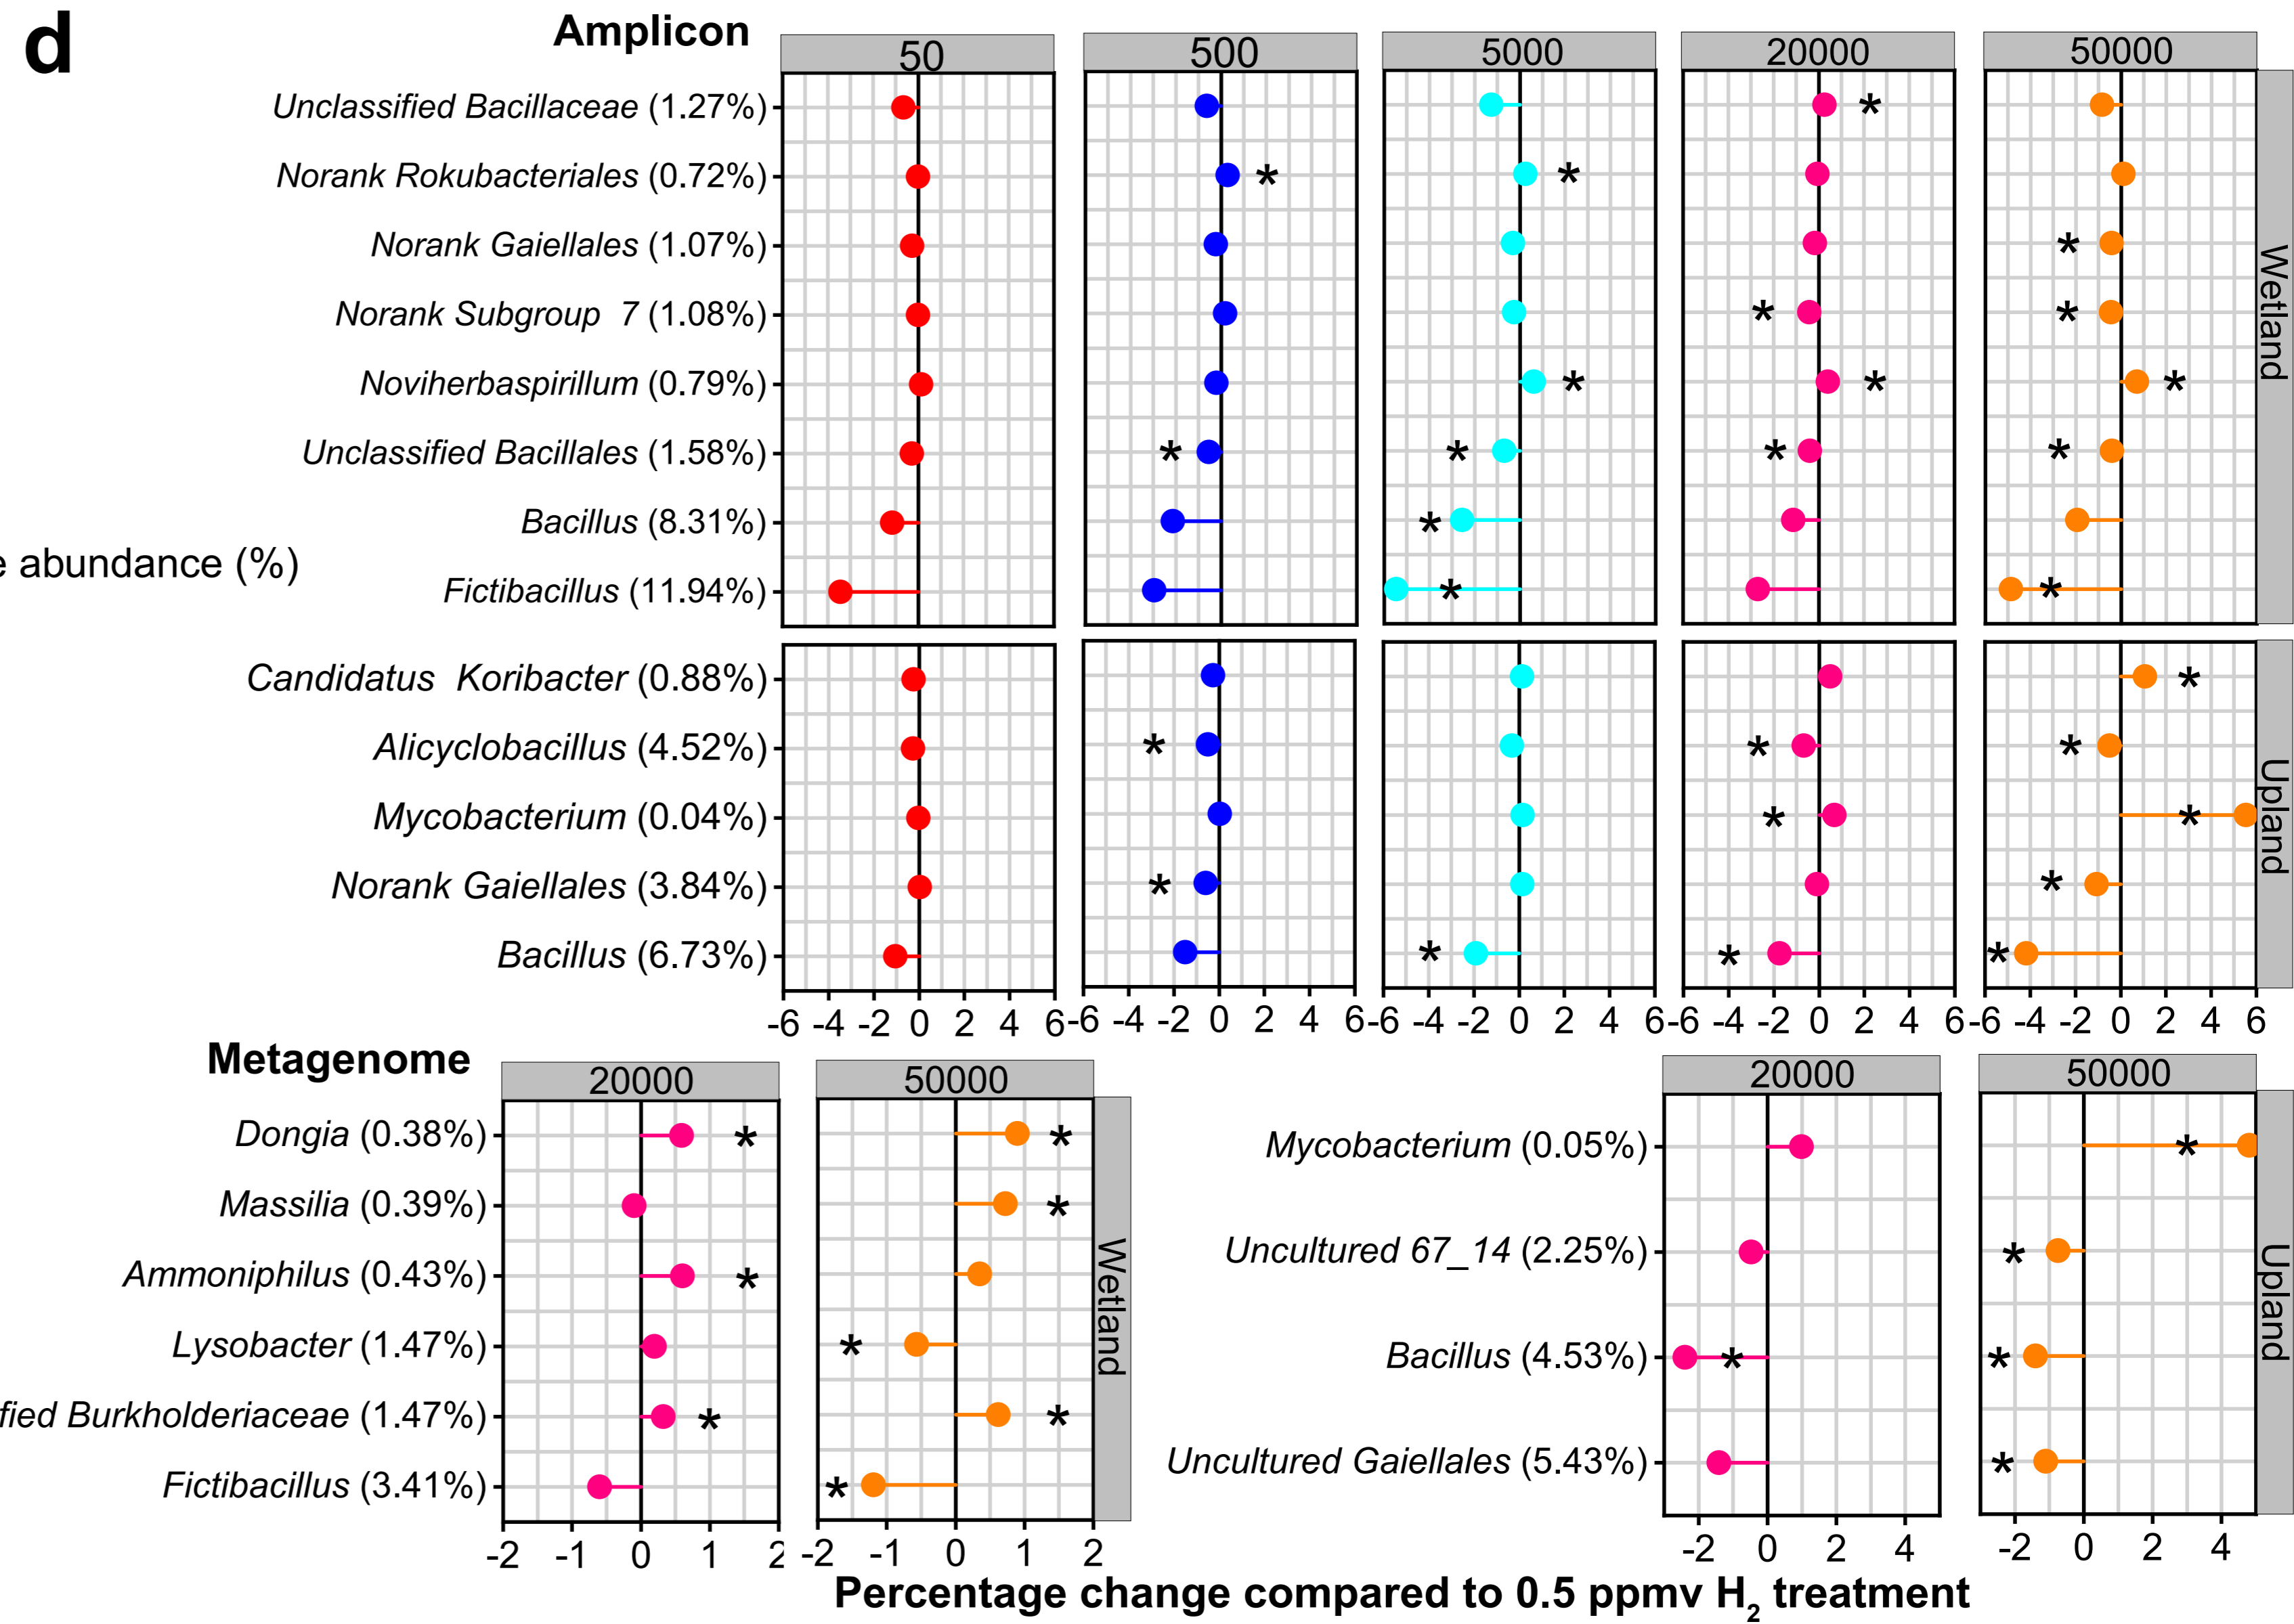

**Relative abundance (%)**

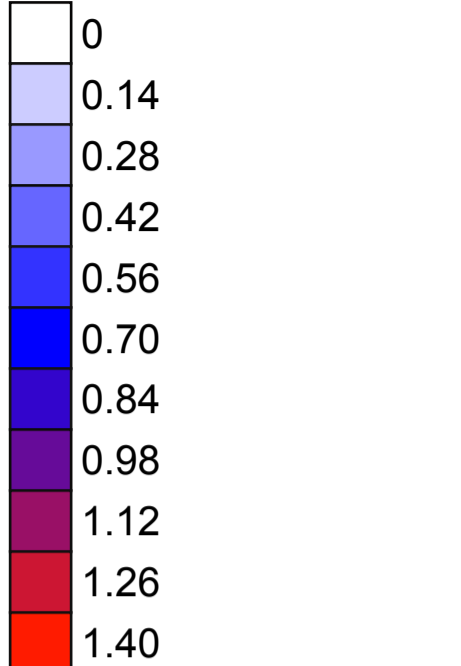

**Metabolic focus**

- Hydrogen oxidation ([NiFe]-group 1, 2)
- Carbon fixation (RuBisCO)
- ★ PCB degradation

**Phylum**

- Actinobacteriota
- Eremiobacterota
- Cyanobacteria
- Firmicutes
- Patescibacteria
- Chloroflexota
- Gemmatimonadota
- Bacteroidota
- Fibrobacterota
- Planctomycetota
- Verrucomicrobiota
- Hydrogenedentota
- Omnitrophota
- Elusimicrobiota
- Proteobacteria
- Bdellovibrionota
- Myxococcota
- Dada bacteria
- MBNT15
- Nitrospirota
- Acidobacteriota
- Dependitiae
- Crenarchaeota
- Nanoarchaeota

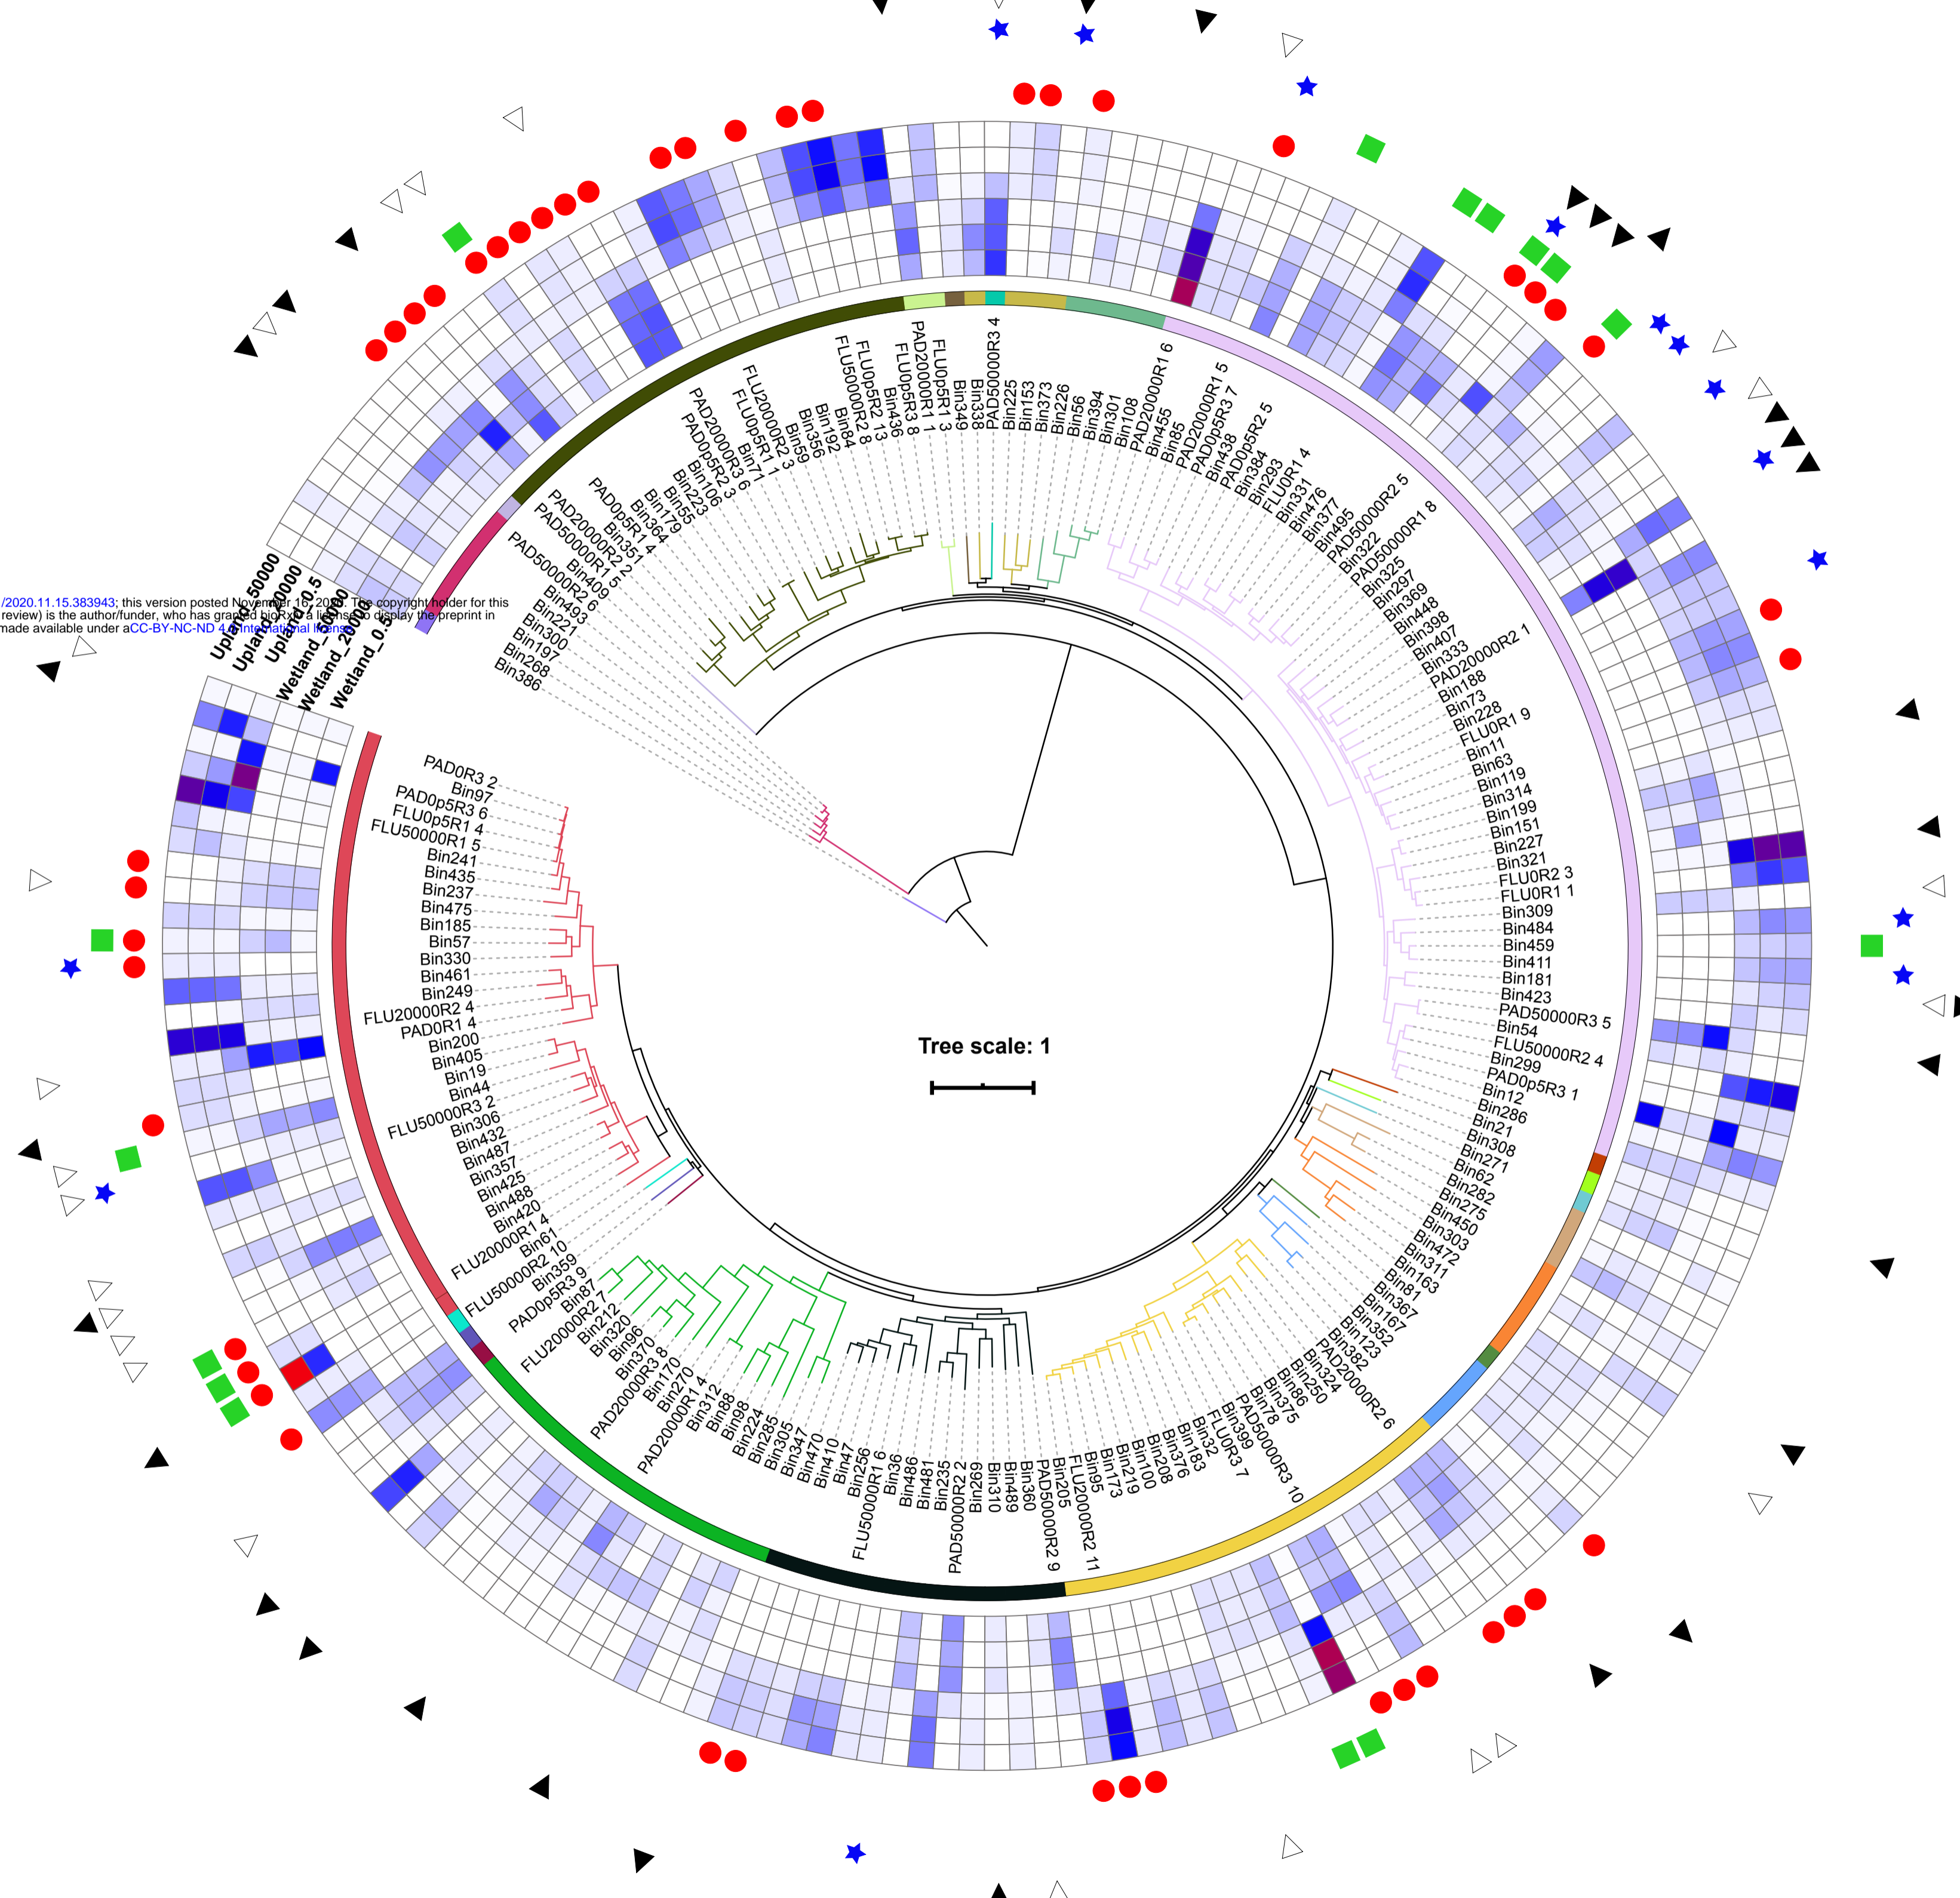

bioRxiv preprint doi: <https://doi.org/10.1101/2020.11.15.383943>; this version posted November 16, 2020. The copyright holder for this preprint (which was not certified by peer review) is the author/funder, who has granted bioRxiv a license to display the preprint in perpetuity. It is made available under aCC-BY-NC-ND 4.0 International license.



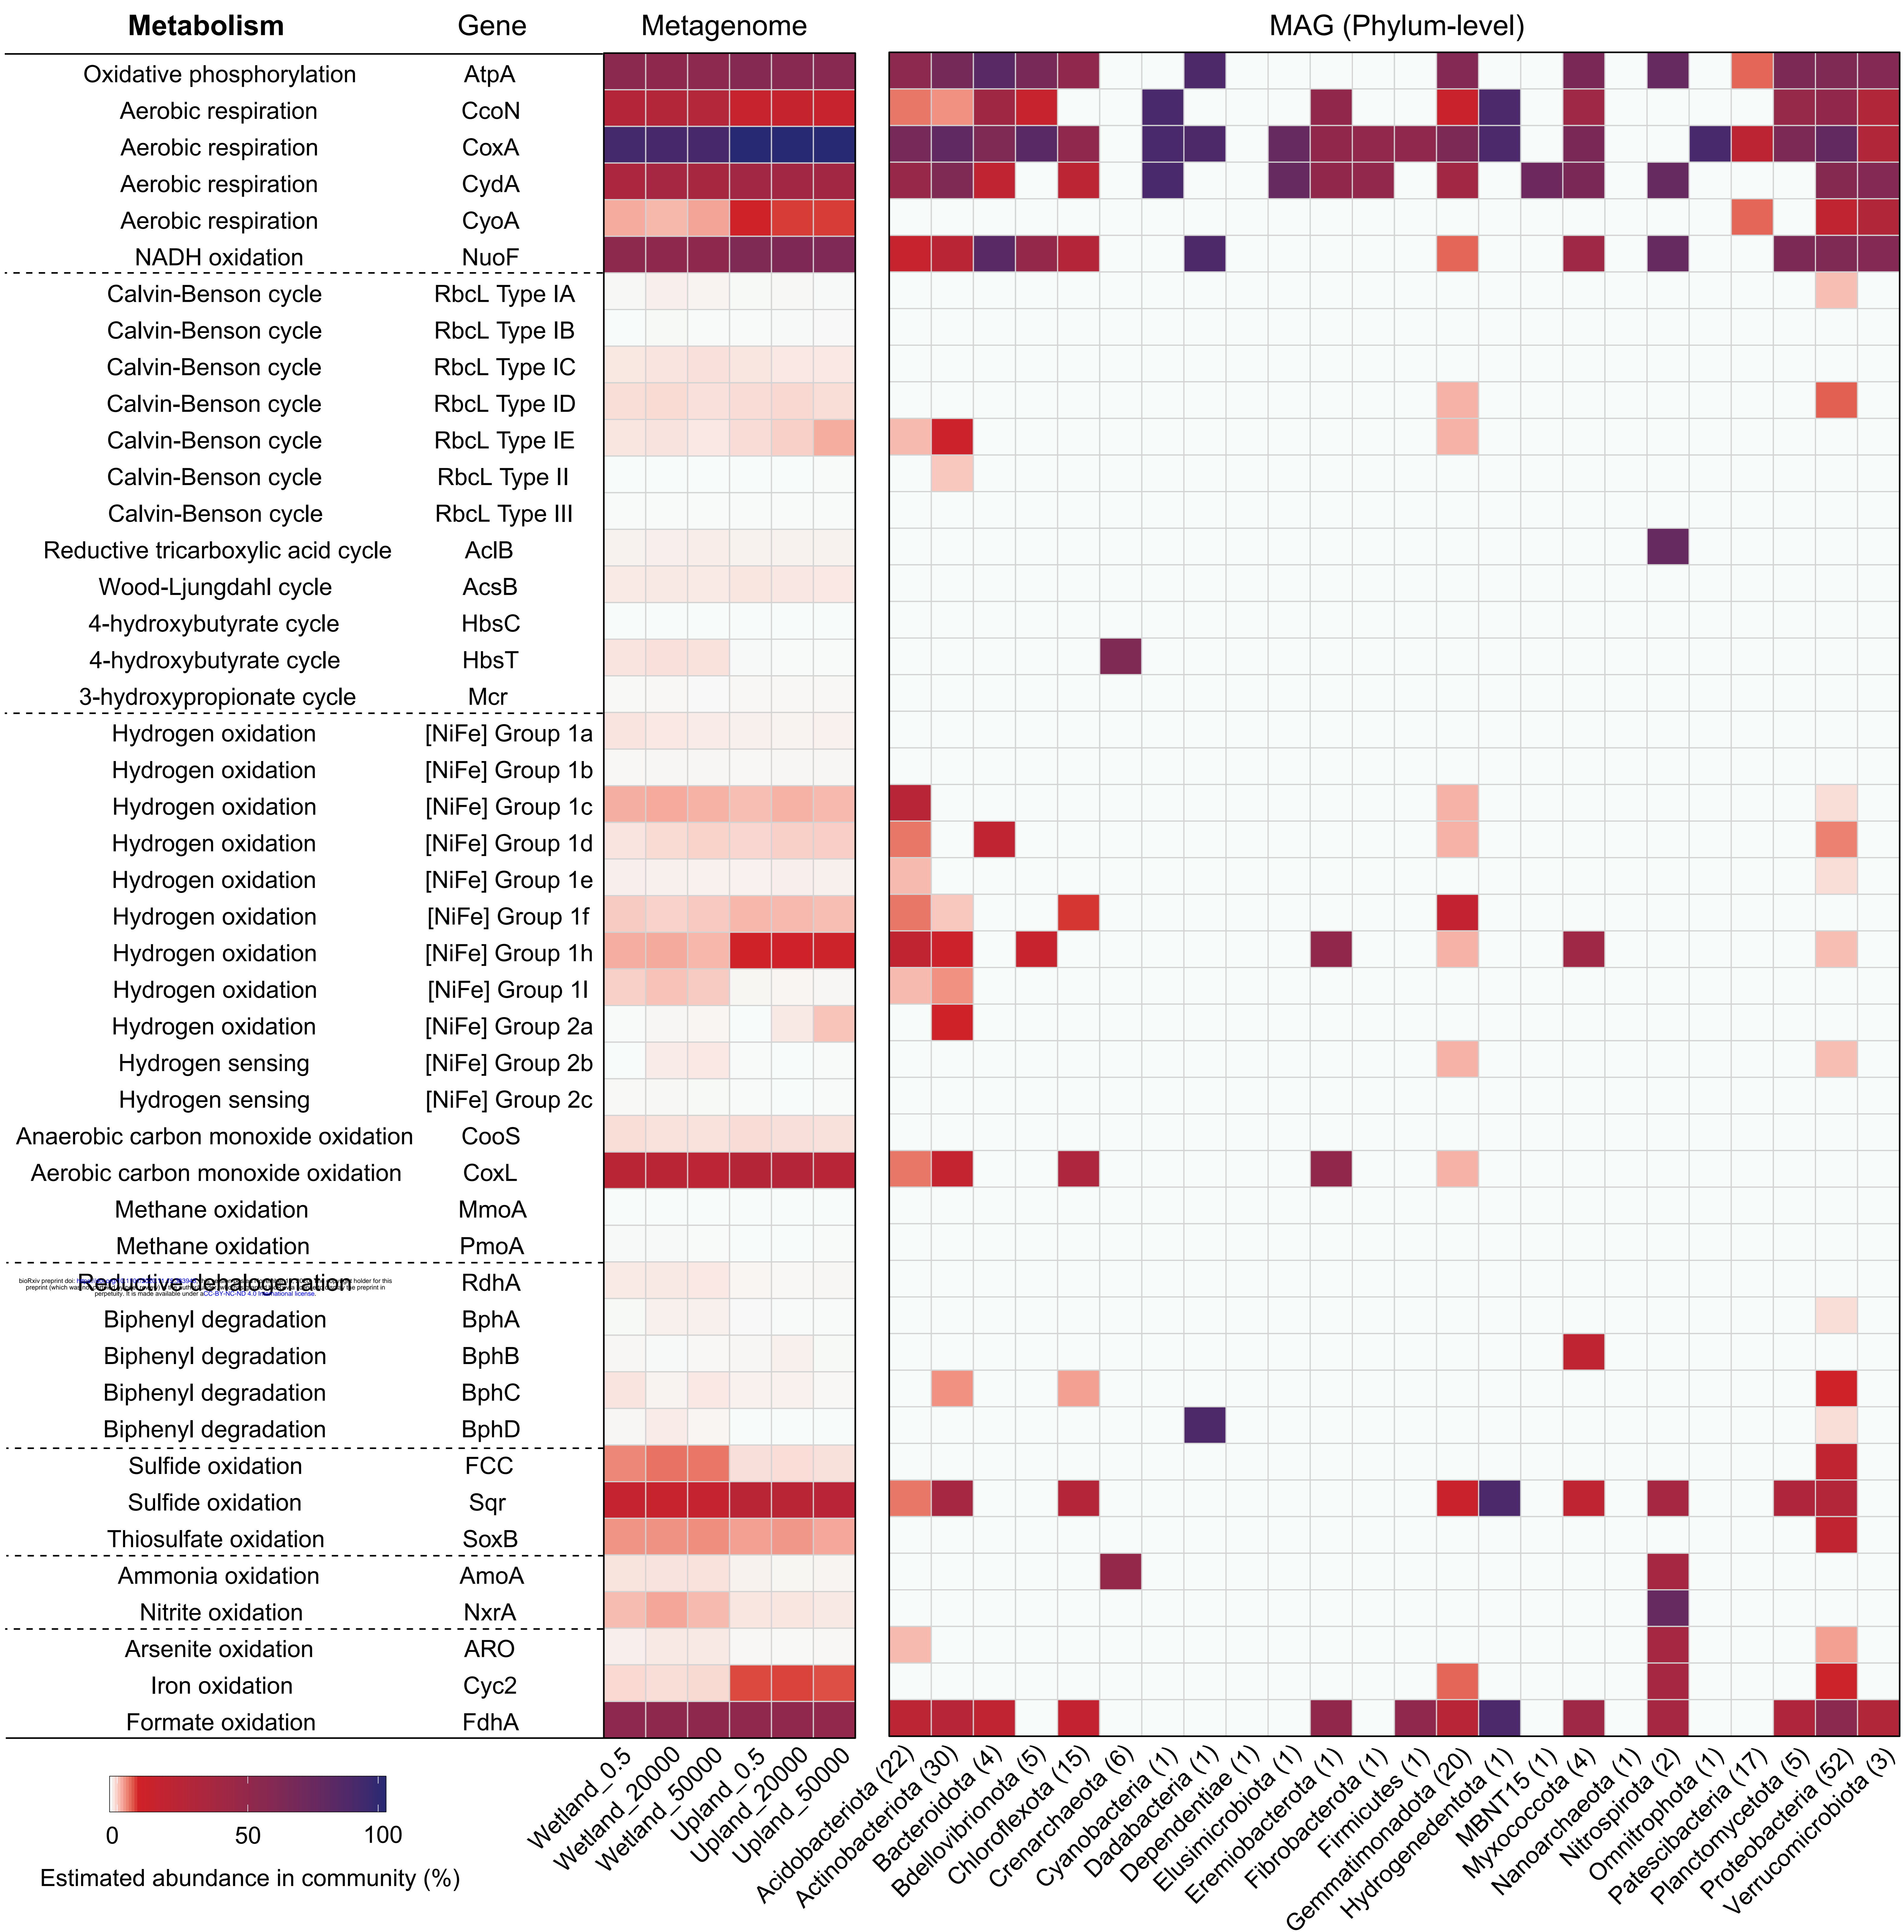

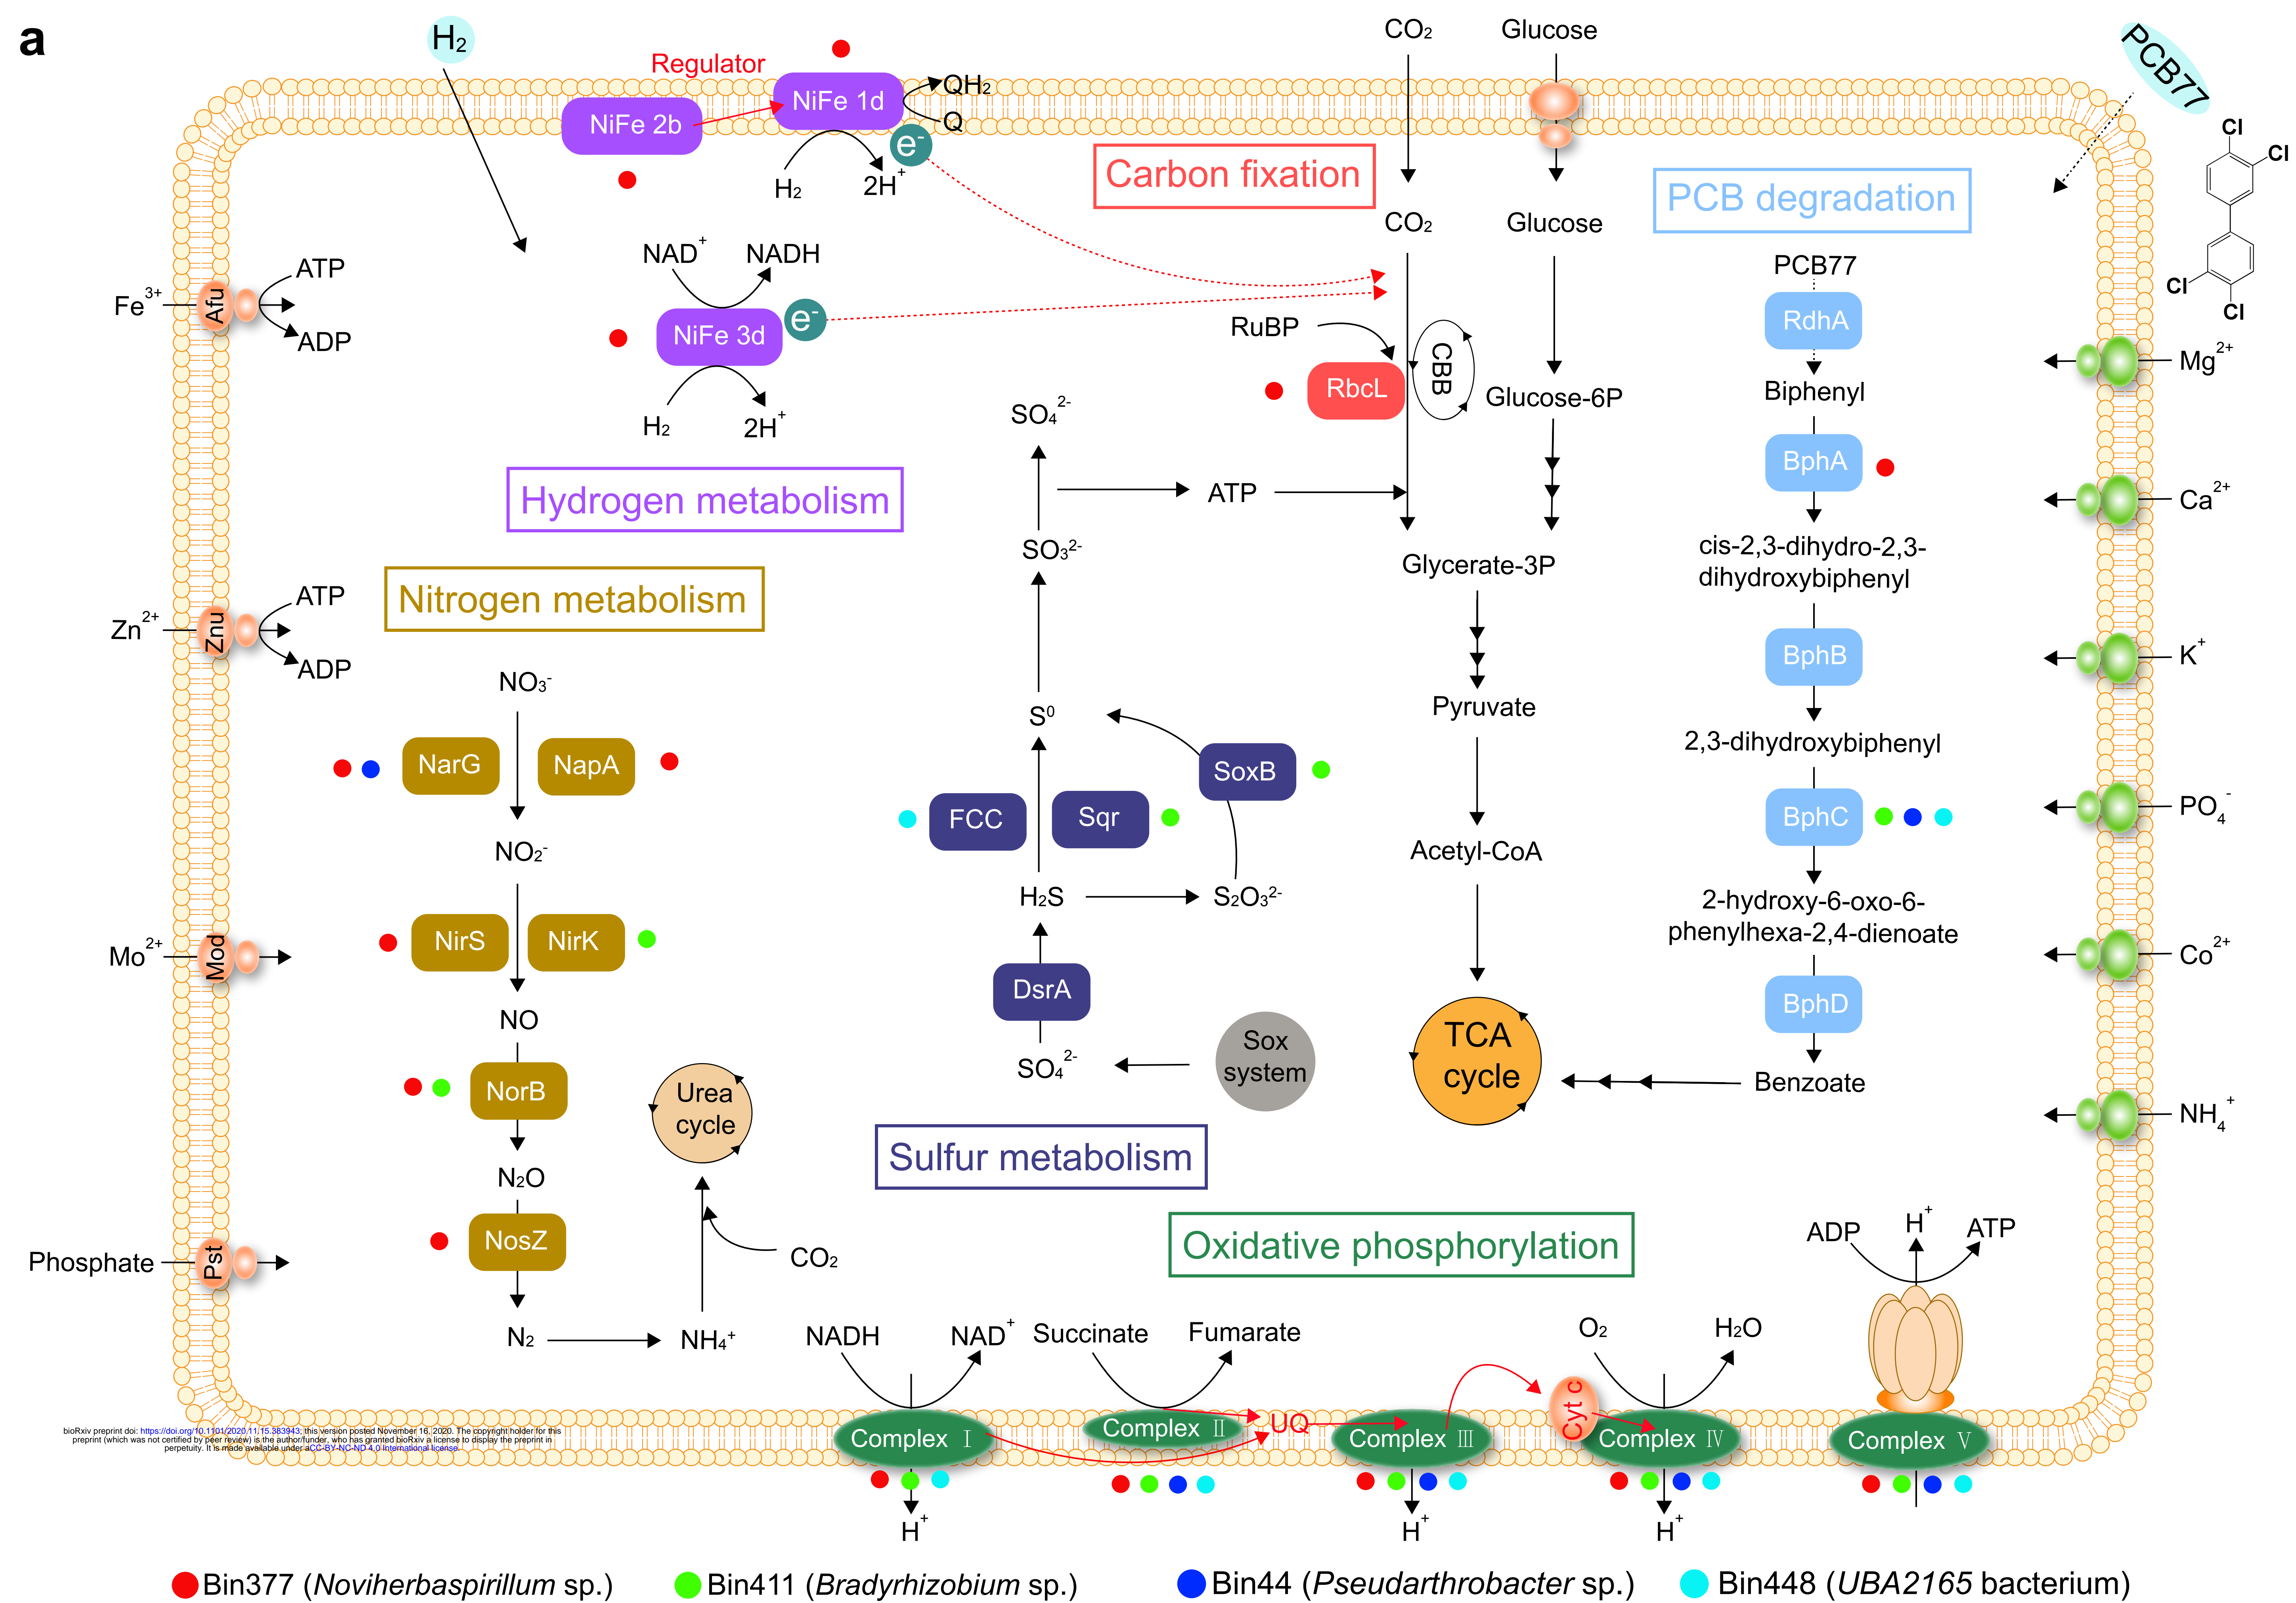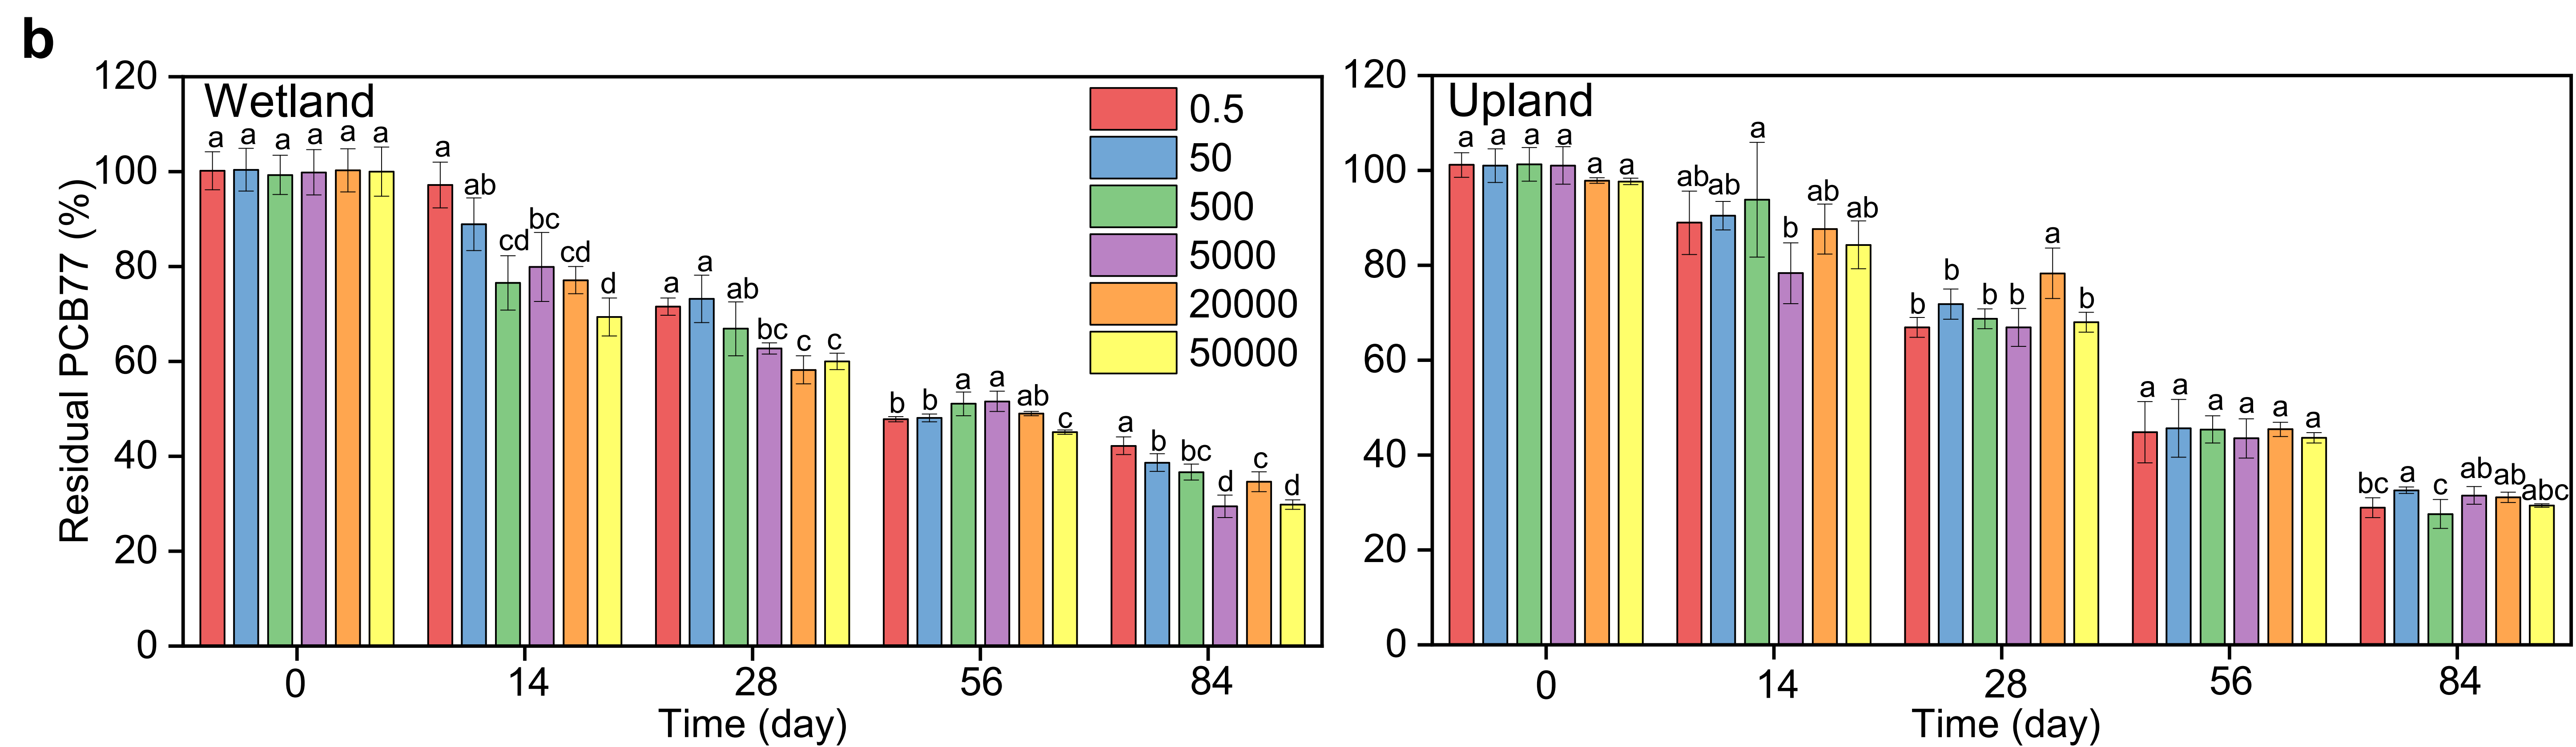

Source: https://www.biorxiv.org/content/10.1101/2020.11.15.383943v1.full.pdf
